# Supplementary material for: Standing at the Gateway to Europe - The Genetic Structure of Western Balkan Populations Based on Autosomal and Haploid Markers
Source: PLoS One. 2014 Aug 22;9(8):e105090. doi: 10.1371/journal.pone.0105090 (PMC4141785; doi:10.1371/journal.pone.0105090)
Supplement: Table S2 — The ethnolinguistic characteristics of studied Western Balkan populations. (XLS) [file pone.0105090.s023.xls]

## Sheet: Table S1
Supplementary Table S2. The ethnolinguistic characteristics of studied Western Balkan populations
Country	N	Populations (abbreviation)	Nationality	Religion	Language family	Language subfamily	Language
Bosnia and Herzegovina	77	Bosniacs (BOS)	Bosnians	Muslims
		Bosnian Croats (BOS.CR and HERZ.CR)		Catholic	Indo-European	Western South Slavic (Serbocroatian)	Bosnian
		Bosnian Serbs (BOS.SRB)		Orthodox
Croatia	19	Croatians (CRO)	Croatians	Catholic	Indo-European	Western South Slavic (Serbocroatian)	Croatian
Serbia	21	Serbians (SERB)	Serbians	Orthodox	Indo-European	Western South Slavic (Serbocroatian)	Serbian
Macedonia	22	Macedonians (MAC)	Macedonians	Orthodox	Indo-European	Eastern South Slavic	Macedonian
Montenegro	18	Montenegrins (MN)	Montenegrins	Orthodox	Indo-European	Western South Slavic (Serbocroatian)	Montenegrin
Kosovo	18	Kosovars/Albanians (KOS)	Kosovars	Muslims (majority)	Indo-European	Albanian	Albanian
