# Supplementary material for: Standing at the Gateway to Europe - The Genetic Structure of Western Balkan Populations Based on Autosomal and Haploid Markers
Source: PLoS One. 2014 Aug 22;9(8):e105090. doi: 10.1371/journal.pone.0105090 (PMC4141785; doi:10.1371/journal.pone.0105090)
Supplement: Table S3 — F3-statistic calculated for all possible triplets of f3(C; A, B) of TreeMix dataset. (XLSX) [file pone.0105090.s024.xlsx]

## Sheet: f3-statistics
Supplementary Table S3. F3-statistic calculated for all possible triplets of f3(C; A, B) of TreeMix dataset. Western Balkan populations in first column are indicated with different colors. Negative f3-statistic values with statistically significant Z-score (Z ≤ -2) has been shaded.
C	A,B	f3	SD for f3	Z-score
Romanians	Ethiopians,Poles	-0.00108597	7.45194e-05	-14.573
Romanians	Belarusians,Ethiopians	-0.00104822	6.19293e-05	-16.9261
Italians	Ethiopians,Poles	-0.00104328	6.93627e-05	-15.0409
Italians	Belarusians,Ethiopians	-0.000996594	5.85359e-05	-17.0253
Italians	French,Ethiopians	-0.000979453	4.83593e-05	-20.2537
Turks	Ethiopians,Poles	-0.000957093	7.41541e-05	-12.9068
Italians	Ukrainians,Ethiopians	-0.000934363	5.61014e-05	-16.6549
Italians	Ethiopians,Croats	-0.000930596	5.03037e-05	-18.4996
Turks	Belarusians,Ethiopians	-0.000920135	6.15523e-05	-14.9488
Romanians	Ukrainians,Ethiopians	-0.000912954	5.80416e-05	-15.7293
Italians	North_Italians,Ethiopians	-0.000897664	5.62871e-05	-15.9479
Turks	Ukrainians,Ethiopians	-0.000888078	5.82288e-05	-15.2515
Italians	Hungarians,Ethiopians	-0.000887434	5.37729e-05	-16.5034
Bulgarians	Ethiopians,Poles	-0.00088652	8.11447e-05	-10.9252
Bulgarians	Armenians,Poles	-0.000871879	5.9273e-05	-14.7096
Romanians	Armenians,Poles	-0.000865843	5.07058e-05	-17.0758
Italians	Ethiopians,Montenegrins	-0.000857623	5.53713e-05	-15.4886
Bulgarians	Belarusians,Ethiopians	-0.000854956	6.97845e-05	-12.2514
Italians	Bosnians,Ethiopians	-0.000850046	5.71541e-05	-14.8729
Italians	Serbians,Ethiopians	-0.000847248	5.15729e-05	-16.4282
Bulgarians	Belarusians,Armenians	-0.000846167	5.17458e-05	-16.3524
Romanians	Belarusians,Armenians	-0.000833949	4.50366e-05	-18.5172
Turks	Ethiopians,Croats	-0.000810736	5.722e-05	-14.1688
Romanians	Russians,Armenians	-0.000800021	4.16207e-05	-19.2217
Macedonians	Armenians,Poles	-0.000794993	5.56233e-05	-14.2925
Italians	Macedonians,Ethiopians	-0.000784406	5.43951e-05	-14.4205
Macedonians	Ethiopians,Poles	-0.000775818	7.69193e-05	-10.0861
Italians	Kosovars,Ethiopians	-0.00076114	6.14114e-05	-12.3941
Turks	Bosnians,Ethiopians	-0.00075659	5.97649e-05	-12.6595
Turks	Hungarians,Ethiopians	-0.000748317	5.80423e-05	-12.8926
Bulgarians	Russians,Armenians	-0.000747827	5.06355e-05	-14.7688
Italians	Ethiopians,Bulgarians	-0.000744518	5.54713e-05	-13.4217
Macedonians	Belarusians,Armenians	-0.000728492	4.9728e-05	-14.6495
Bulgarians	Ukrainians,Ethiopians	-0.000723088	6.76635e-05	-10.6865
Greeks	Ethiopians,Poles	-0.000722758	7.25179e-05	-9.96663
Bulgarians	Ukrainians,Armenians	-0.000720582	4.99222e-05	-14.4341
Romanians	Ukrainians,Armenians	-0.000704964	4.2369e-05	-16.6387
Macedonians	Belarusians,Ethiopians	-0.000703465	6.83004e-05	-10.2996
Serbians	Ethiopians,Poles	-0.000701498	7.13199e-05	-9.83593
Bosnians	Armenians,Poles	-0.000700129	5.49572e-05	-12.7395
Turks	Russians,Ethiopians	-0.000698254	5.78413e-05	-12.0719
Turks	Ethiopians,Montenegrins	-0.000693842	6.24557e-05	-11.1093
Serbians	Armenians,Poles	-0.000693061	5.04777e-05	-13.73
Turks	French,Ethiopians	-0.000684226	5.74035e-05	-11.9196
Hungarians	Ethiopians,Poles	-0.0006701	7.12156e-05	-9.40946
Turks	Serbians,Ethiopians	-0.000669275	5.65879e-05	-11.8272
Bosnians	Ethiopians,Poles	-0.000663877	7.57017e-05	-8.76965
Bosnians	Belarusians,Armenians	-0.000662929	4.86663e-05	-13.6219
Greeks	Belarusians,Ethiopians	-0.000662864	6.26769e-05	-10.5759
Romanians	Ethiopians,Croats	-0.000647005	5.74691e-05	-11.2583
Hungarians	Armenians,Poles	-0.000640356	5.08892e-05	-12.5833
Croats	Armenians,Poles	-0.000625046	5.14819e-05	-12.1411
Romanians	Russians,Ethiopians	-0.000624503	6.07573e-05	-10.2786
Serbians	Belarusians,Ethiopians	-0.000624013	6.04532e-05	-10.3222
Serbians	Belarusians,Armenians	-0.000621428	4.52938e-05	-13.7199
Bosnians	Belarusians,Ethiopians	-0.000620825	6.45655e-05	-9.61543
Turks	Ethiopians,Bulgarians	-0.000619817	5.98726e-05	-10.3523
Turks	Kosovars,Ethiopians	-0.000613826	6.59384e-05	-9.30907
Greeks	Armenians,Poles	-0.000610479	4.84548e-05	-12.5989
Bulgarians	Russians,Italians_Abruzzo	-0.000608217	4.54042e-05	-13.3956
Turks	Macedonians,Ethiopians	-0.000603144	6.19419e-05	-9.73725
Bulgarians	Belarusians,Italians_Abruzzo	-0.00060288	4.64626e-05	-12.9756
Croats	Ethiopians,Poles	-0.000602813	6.99573e-05	-8.61687
Hungarians	Belarusians,Ethiopians	-0.000599232	6.12207e-05	-9.78807
Macedonians	Russians,Armenians	-0.0005939	4.94491e-05	-12.0103
Romanians	Turks,Poles	-0.000592146	4.68739e-05	-12.6327
Romanians	Turks,Belarusians	-0.000591358	4.42072e-05	-13.377
Bulgarians	Italians_Abruzzo,Poles	-0.000587763	5.25377e-05	-11.1874
Romanians	Hungarians,Ethiopians	-0.000587409	5.80853e-05	-10.1129
Bosnians	Russians,Armenians	-0.000583807	4.71546e-05	-12.3807
Turks	North_Italians,Ethiopians	-0.000580715	6.42555e-05	-9.03759
Hungarians	Belarusians,Armenians	-0.00057534	4.68256e-05	-12.2869
Macedonians	Ukrainians,Armenians	-0.000574801	4.97006e-05	-11.5653
Greeks	Belarusians,Armenians	-0.000556436	4.37959e-05	-12.7052
Bulgarians	Turks,Belarusians	-0.000554638	5.05403e-05	-10.9742
Romanians	Russians,Italians_Abruzzo	-0.000552948	3.7777e-05	-14.6372
Greeks	Ukrainians,Ethiopians	-0.000550954	5.87791e-05	-9.3733
Bulgarians	Turks,Poles	-0.000549245	5.74125e-05	-9.56663
Romanians	Bosnians,Ethiopians	-0.000546957	6.10041e-05	-8.96591
Macedonians	Ukrainians,Ethiopians	-0.000543491	6.62222e-05	-8.20707
Croats	Belarusians,Armenians	-0.00053646	4.40547e-05	-12.1771
Bulgarians	Ukrainians,Italians_Abruzzo	-0.000533243	4.56853e-05	-11.6721
Macedonians	Italians_Abruzzo,Poles	-0.000516948	5.13125e-05	-10.0745
Hungarians	Italians_Abruzzo,Poles	-0.000514259	4.38983e-05	-11.7148
Serbians	Russians,Armenians	-0.000511473	4.27463e-05	-11.9653
Croats	Belarusians,Ethiopians	-0.000508376	6.04091e-05	-8.41555
Serbians	Italians_Abruzzo,Poles	-0.000505471	4.53013e-05	-11.158
Italians	Russians,Ethiopians	-0.000503125	5.71258e-05	-8.80731
Bosnians	Ukrainians,Armenians	-0.000503119	4.6051e-05	-10.9253
Hungarians	Russians,Italians_Abruzzo	-0.000500654	3.69252e-05	-13.5586
Italians	Tuscans,Ethiopians	-0.000499259	6.97902e-05	-7.15372
Bosnians	Russians,Italians_Abruzzo	-0.000498833	4.15683e-05	-12.0003
Italians	Ethiopians,Greeks	-0.000495841	4.90971e-05	-10.0992
Macedonians	Belarusians,Italians_Abruzzo	-0.000491277	4.60429e-05	-10.67
Croats	Italians_Abruzzo,Poles	-0.000490134	4.40449e-05	-11.128
Hungarians	Belarusians,Italians_Abruzzo	-0.000490073	4.02338e-05	-12.1806
Romanians	Ukrainians,Turks	-0.000488147	4.01789e-05	-12.1493
Romanians	Belarusians,Italians_Abruzzo	-0.000483199	4.1148e-05	-11.7429
Hungarians	Russians,Armenians	-0.000482244	4.30327e-05	-11.2064
Greeks	Ethiopians,Croats	-0.000481763	5.29719e-05	-9.09468
Bosnians	Russians,Kosovars	-0.000481485	4.91953e-05	-9.78721
Bulgarians	Ethiopians,Croats	-0.0004768	6.47988e-05	-7.35816
Serbians	Belarusians,Italians_Abruzzo	-0.000474667	3.93083e-05	-12.0755
Bosnians	Belarusians,Italians_Abruzzo	-0.000474277	4.5205e-05	-10.4917
Romanians	Italians_Abruzzo,Poles	-0.000474263	4.59018e-05	-10.3321
Bosnians	Italians_Abruzzo,Poles	-0.000470648	4.9883e-05	-9.43503
Romanians	French,Ethiopians	-0.000470051	5.47411e-05	-8.5868
Serbians	Russians,Italians_Abruzzo	-0.00046839	3.74068e-05	-12.5215
Croats	Russians,Italians_Abruzzo	-0.000468289	3.52168e-05	-13.2973
Tuscans	Ethiopians,Poles	-0.000466449	0.000103815	-4.49308
Turks	Russians,Armenians	-0.000464589	4.16189e-05	-11.1629
Bosnians	Turks,Poles	-0.000463375	5.26663e-05	-8.79832
Turks	Ethiopians,Romanians	-0.000463271	5.91918e-05	-7.82661
Hungarians	Turks,Poles	-0.000461324	4.7608e-05	-9.69007
Macedonians	Russians,Italians_Abruzzo	-0.000460362	4.45852e-05	-10.3255
Croats	Russians,Armenians	-0.000458694	4.14865e-05	-11.0565
Bosnians	Turks,Belarusians	-0.00045728	4.71552e-05	-9.69734
Italians	Armenians,Poles	-0.000457184	4.41927e-05	-10.3452
Croats	Turks,Poles	-0.000456457	4.52973e-05	-10.0769
Bulgarians	Ukrainians,Turks	-0.000454827	4.88891e-05	-9.30325
Bosnians	Ukrainians,Ethiopians	-0.000454732	5.89599e-05	-7.71256
Romanians	Serbians,Ethiopians	-0.000451992	5.90661e-05	-7.65231
Hungarians	Tuscans,Poles	-0.000451653	5.69787e-05	-7.92669
Greeks	Ukrainians,Armenians	-0.000450809	4.03761e-05	-11.1653
Bulgarians	Armenians,Hungarians	-0.00045079	4.92799e-05	-9.14755
Hungarians	Russians,Tuscans	-0.000450648	4.76294e-05	-9.46156
Croats	Belarusians,Italians_Abruzzo	-0.000442378	3.90349e-05	-11.3329
Bulgarians	Russians,Greeks	-0.000442193	4.82631e-05	-9.16214
Greeks	Russians,Armenians	-0.000441151	4.24506e-05	-10.3921
Bulgarians	Armenians,Croats	-0.000439926	4.84932e-05	-9.07191
Serbians	Ukrainians,Armenians	-0.000438453	4.22496e-05	-10.3777
Bulgarians	Hungarians,Ethiopians	-0.000435687	6.48848e-05	-6.71477
Italians	Armenians,French	-0.00043486	3.22089e-05	-13.5012
Serbians	Ukrainians,Ethiopians	-0.000434754	5.69485e-05	-7.63416
Italians	Ethiopians,Romanians	-0.000431571	5.45307e-05	-7.91426
Greeks	Bosnians,Ethiopians	-0.00042947	5.9262e-05	-7.24697
Hungarians	Russians,North_Italians	-0.000428865	3.97687e-05	-10.784
Hungarians	Turks,Belarusians	-0.000427414	4.36129e-05	-9.80017
Bosnians	Kosovars,Belarusians	-0.000426016	5.20151e-05	-8.19025
Bulgarians	Belarusians,Greeks	-0.000425248	4.99092e-05	-8.52044
Greeks	Ethiopians,Montenegrins	-0.000424491	5.83156e-05	-7.27921
Tuscans	Belarusians,Ethiopians	-0.000424429	9.50943e-05	-4.46324
Greeks	Hungarians,Ethiopians	-0.000423617	5.63314e-05	-7.52009
Bosnians	Russians,Greeks	-0.000423594	4.06257e-05	-10.4268
Hungarians	Belarusians,Tuscans	-0.000422806	5.10981e-05	-8.27438
Hungarians	North_Italians,Poles	-0.0004228	5.01975e-05	-8.42273
Macedonians	Turks,Poles	-0.00042187	5.39208e-05	-7.82388
Bosnians	Kosovars,Poles	-0.000420137	5.91931e-05	-7.09773
Romanians	Ethiopians,Montenegrins	-0.000416774	6.2837e-05	-6.63263
Italians	Belarusians,Armenians	-0.000416354	3.9597e-05	-10.5148
Bulgarians	Russians,Kosovars	-0.000415073	5.44995e-05	-7.61609
Serbians	Turks,Poles	-0.00041368	4.90417e-05	-8.43528
Turks	Ethiopians,Greeks	-0.000411358	5.50831e-05	-7.46796
Romanians	Ukrainians,Italians_Abruzzo	-0.000410161	3.86233e-05	-10.6195
Bulgarians	Ukrainians,Greeks	-0.00040529	4.69377e-05	-8.63465
Romanians	Armenians,Croats	-0.000404647	4.19641e-05	-9.64268
Croats	Turks,Belarusians	-0.000398977	4.20705e-05	-9.48352
Greeks	Serbians,Ethiopians	-0.000397245	5.45125e-05	-7.28723
Romanians	Armenians,Hungarians	-0.000397028	4.25258e-05	-9.33617
Bulgarians	Greeks,Poles	-0.000396918	5.44864e-05	-7.28472
Macedonians	Ukrainians,Italians_Abruzzo	-0.000393534	4.50802e-05	-8.72963
Romanians	Russians,Turks	-0.000389519	4.11129e-05	-9.4744
Romanians	Russians,Tuscans	-0.000389116	5.11378e-05	-7.60917
Greeks	French,Ethiopians	-0.000387731	5.35458e-05	-7.24111
Bosnians	Belarusians,Greeks	-0.00038743	4.58467e-05	-8.45057
Macedonians	Turks,Belarusians	-0.000386475	4.96044e-05	-7.79114
Bulgarians	Russians,Tuscans	-0.000382712	5.697e-05	-6.71778
Hungarians	Russians,Greeks	-0.000382175	3.58918e-05	-10.648
Romanians	Russians,Greeks	-0.000380953	4.04261e-05	-9.42344
Serbians	Kosovars,Poles	-0.000380245	5.51997e-05	-6.88853
Greeks	Kosovars,Ethiopians	-0.000379895	6.66262e-05	-5.70189
Bulgarians	Kosovars,Belarusians	-0.000378824	5.64418e-05	-6.71176
Tuscans	French,Ethiopians	-0.000377067	8.6192e-05	-4.37474
Serbians	Russians,Kosovars	-0.000376327	4.75652e-05	-7.91181
Serbians	Greeks,Poles	-0.000375984	4.42225e-05	-8.50211
Bosnians	Russians,Tuscans	-0.000374874	5.25918e-05	-7.128
Serbians	Turks,Belarusians	-0.000373152	4.35411e-05	-8.57011
Hungarians	Greeks,Poles	-0.000370959	4.37108e-05	-8.48668
Hungarians	Ukrainians,Ethiopians	-0.000370843	5.761e-05	-6.43712
Croats	North_Italians,Poles	-0.000370637	4.98543e-05	-7.4344
Bosnians	Greeks,Poles	-0.000370589	5.10675e-05	-7.25685
Bosnians	Ukrainians,Italians_Abruzzo	-0.000370415	4.15815e-05	-8.90817
Bosnians	Ukrainians,Kosovars	-0.000368596	4.91572e-05	-7.49831
Croats	Russians,North_Italians	-0.000368462	3.85856e-05	-9.54922
Croats	Ukrainians,Armenians	-0.000367116	4.26131e-05	-8.6151
Bulgarians	Russians,Ethiopians	-0.000366824	6.66513e-05	-5.50363
Bulgarians	Bosnians,Ethiopians	-0.000365164	6.97376e-05	-5.23625
Croats	Russians,Greeks	-0.000364793	3.52763e-05	-10.341
Serbians	Russians,Greeks	-0.000363724	3.79306e-05	-9.58919
Croats	Greeks,Poles	-0.000361817	4.2728e-05	-8.46792
Bulgarians	Kosovars,Poles	-0.000361456	6.47304e-05	-5.58401
Italians	Ukrainians,Armenians	-0.000360407	3.7128e-05	-9.70713
Bulgarians	Belarusians,Tuscans	-0.000360113	6.06259e-05	-5.93993
Hungarians	Belarusians,Greeks	-0.000359986	3.91454e-05	-9.1961
Serbians	Belarusians,Greeks	-0.000358393	4.04129e-05	-8.86829
Hungarians	North_Italians,Belarusians	-0.000356248	4.40221e-05	-8.09248
Bulgarians	Ukrainians,Kosovars	-0.000355628	5.40963e-05	-6.57398
Montenegrins	Armenians,Poles	-0.000354766	6.05903e-05	-5.85516
Croats	Tuscans,Poles	-0.000353258	5.81999e-05	-6.06974
Hungarians	Ukrainians,Armenians	-0.000353234	4.51351e-05	-7.82615
Serbians	Tuscans,Poles	-0.00035208	5.94707e-05	-5.92023
Serbians	Kosovars,Belarusians	-0.000351692	4.95631e-05	-7.09583
Bulgarians	Tuscans,Poles	-0.000349657	6.80447e-05	-5.13864
Serbians	Ukrainians,Italians_Abruzzo	-0.00034764	3.68226e-05	-9.44094
Greeks	Armenians,Croats	-0.00034725	3.84123e-05	-9.04007
Croats	Russians,Kosovars	-0.000346635	4.5572e-05	-7.60631
Croats	Russians,Tuscans	-0.000344014	4.61308e-05	-7.45736
Greeks	Armenians,Hungarians	-0.000341082	3.85142e-05	-8.856
Bulgarians	Russians,North_Italians	-0.000339588	5.16268e-05	-6.57774
Bulgarians	Armenians,French	-0.000336909	4.66249e-05	-7.22594
Croats	Kosovars,Poles	-0.000335317	5.32563e-05	-6.2963
Bosnians	Tuscans,Poles	-0.000334088	6.38389e-05	-5.23331
Bosnians	Ukrainians,Greeks	-0.000333248	4.11579e-05	-8.09681
Bosnians	Belarusians,Tuscans	-0.000333057	5.56249e-05	-5.98755
Croats	Ukrainians,Ethiopians	-0.000332748	5.44344e-05	-6.11282
Bulgarians	Ukrainians,Tuscans	-0.000332374	5.70365e-05	-5.82739
Italians	North_Italians,Armenians	-0.000331941	3.76975e-05	-8.80538
Italians	Armenians,Hungarians	-0.000331087	3.47477e-05	-9.52831
Bosnians	Russians,North_Italians	-0.000331044	4.52425e-05	-7.31709
Croats	Ukrainians,Italians_Abruzzo	-0.000328981	3.54591e-05	-9.27775
Turks	Armenians,Poles	-0.000327785	4.89496e-05	-6.69638
Serbians	Russians,Tuscans	-0.0003276	4.88594e-05	-6.70496
Croats	Belarusians,Greeks	-0.000327274	3.97185e-05	-8.23984
Hungarians	Russians,Kosovars	-0.000325401	4.52427e-05	-7.19234
Montenegrins	Ethiopians,Poles	-0.000325157	8.19043e-05	-3.96997
Hungarians	Ukrainians,Italians_Abruzzo	-0.000323914	4.00099e-05	-8.09586
Bosnians	Ukrainians,Turks	-0.000323245	4.32859e-05	-7.46766
Macedonians	Kosovars,Poles	-0.000322903	5.90515e-05	-5.46815
Italians	Armenians,Croats	-0.000322272	3.41383e-05	-9.44019
Romanians	Russians,Kosovars	-0.000320893	4.67498e-05	-6.86407
Tuscans	Ukrainians,Ethiopians	-0.0003203	9.3823e-05	-3.41387
Greeks	Armenians,French	-0.00031695	3.69223e-05	-8.58426
Serbians	Belarusians,Tuscans	-0.000316616	5.13707e-05	-6.16335
Bulgarians	Armenians,Bosnians	-0.000314271	4.9314e-05	-6.37285
Italians	Russians,Armenians	-0.000312677	3.78761e-05	-8.25525
Bulgarians	French,Ethiopians	-0.000310051	6.18387e-05	-5.01386
Bulgarians	Turks,Hungarians	-0.000307188	4.85533e-05	-6.32681
Macedonians	Ethiopians,Croats	-0.000306088	6.25092e-05	-4.89669
Hungarians	Kosovars,Poles	-0.000305843	5.39818e-05	-5.66568
Macedonians	Greeks,Poles	-0.000304062	5.16223e-05	-5.89013
Macedonians	Armenians,Croats	-0.000303031	4.71202e-05	-6.43101
Romanians	Turks,Hungarians	-0.000302363	4.07416e-05	-7.42148
Romanians	Belarusians,Tuscans	-0.000302105	5.43238e-05	-5.56119
Ukranians	Ethiopians,Poles	-0.000301751	6.93732e-05	-4.34968
Bulgarians	Serbians,Ethiopians	-0.000301621	6.48247e-05	-4.65287
Croats	Belarusians,Tuscans	-0.000300842	4.9732e-05	-6.04926
Romanians	Belarusians,Greeks	-0.000299596	4.47501e-05	-6.69488
Romanians	Turks,Croats	-0.000299539	3.9748e-05	-7.53597
Macedonians	Kosovars,Belarusians	-0.000299482	5.51645e-05	-5.4289
Macedonians	Russians,Kosovars	-0.000299479	5.41317e-05	-5.53242
Bulgarians	North_Italians,Poles	-0.000299463	6.3707e-05	-4.70063
Hungarians	Ukrainians,Tuscans	-0.000298545	4.96868e-05	-6.00853
Romanians	Tuscans,Poles	-0.00029783	6.29755e-05	-4.7293
Turks	Belarusians,Armenians	-0.000296679	4.50526e-05	-6.58517
Bulgarians	Serbians,Armenians	-0.000295417	4.81419e-05	-6.13637
Greeks	Serbians,Armenians	-0.000293402	3.70801e-05	-7.91266
Serbians	North_Italians,Poles	-0.000292965	5.34481e-05	-5.4813
Bulgarians	Italians_Abruzzo,Hungarians	-0.000292771	4.45733e-05	-6.5683
Macedonians	Belarusians,Greeks	-0.000291604	4.78122e-05	-6.09895
Romanians	Armenians,French	-0.000291424	4.01819e-05	-7.25264
French	Russians,North_Italians	-0.000291418	3.48769e-05	-8.35562
Bulgarians	Italians_Abruzzo,Croats	-0.000290722	4.38309e-05	-6.63281
Romanians	Armenians,Bosnians	-0.000290581	4.52943e-05	-6.41539
Romanians	Macedonians,Ethiopians	-0.000290258	6.39486e-05	-4.53892
Croats	Kosovars,Belarusians	-0.000289812	4.74892e-05	-6.10269
Ukranians	Armenians,Poles	-0.000289616	5.25192e-05	-5.51448
Bulgarians	Russians,Turks	-0.000288388	5.00936e-05	-5.75697
Bulgarians	Turks,Croats	-0.000285881	4.7833e-05	-5.97664
Turks	Tuscans,Ethiopians	-0.000285522	7.27643e-05	-3.92393
French	Ethiopians,Poles	-0.00028441	6.6859e-05	-4.25388
Macedonians	Tuscans,Poles	-0.000284343	6.72657e-05	-4.22716
Hungarians	Kosovars,Belarusians	-0.000283908	4.97807e-05	-5.70317
Bosnians	North_Italians,Poles	-0.000283188	5.61955e-05	-5.03934
Romanians	Russians,North_Italians	-0.000282998	4.23789e-05	-6.67779
Greeks	Armenians,Montenegrins	-0.000282603	4.05309e-05	-6.97253
Serbians	Ukrainians,Greeks	-0.000281045	3.77248e-05	-7.44989
Greeks	Armenians,Bosnians	-0.000280938	3.9387e-05	-7.13276
Croats	North_Italians,Belarusians	-0.000280515	4.36769e-05	-6.4225
Macedonians	Armenians,Hungarians	-0.00028016	4.82496e-05	-5.80647
Romanians	Greeks,Poles	-0.000277448	4.84749e-05	-5.72355
Romanians	Ukrainians,Greeks	-0.000276238	4.00126e-05	-6.90379
Serbians	Russians,North_Italians	-0.000275555	4.43257e-05	-6.21659
Bulgarians	Kosovars,Hungarians	-0.000274879	5.42724e-05	-5.06481
Montenegrins	Belarusians,Armenians	-0.000273505	5.383e-05	-5.08091
Macedonians	Russians,Greeks	-0.000272297	4.64427e-05	-5.86307
Bulgarians	North_Italians,Belarusians	-0.000272215	5.37092e-05	-5.0683
Bulgarians	Ukrainians,North_Italians	-0.000271589	5.21051e-05	-5.21234
Serbians	Ukrainians,Kosovars	-0.000271106	4.64221e-05	-5.84003
Bosnians	Ukrainians,Tuscans	-0.000271092	5.1977e-05	-5.21562
Romanians	Ukrainians,Tuscans	-0.000270965	5.26426e-05	-5.14727
Turks	Ukrainians,Armenians	-0.000270905	4.25561e-05	-6.36583
Italians	Serbians,Armenians	-0.000269594	3.39601e-05	-7.93855
Ukranians	Belarusians,Ethiopians	-0.000263814	6.02938e-05	-4.37547
Croats	Ukrainians,Greeks	-0.000263556	3.60795e-05	-7.30487
Tuscans	Armenians,Poles	-0.000262189	8.41e-05	-3.11758
Bulgarians	Bosnians,Italians_Abruzzo	-0.000259636	4.56548e-05	-5.68693
Hungarians	Ukrainians,North_Italians	-0.000259101	4.29562e-05	-6.03176
Macedonians	Ukrainians,Turks	-0.000258557	4.83508e-05	-5.34753
Ukranians	Belarusians,Armenians	-0.00025753	4.47044e-05	-5.76073
French	Russians,Italians_Abruzzo	-0.000255521	3.11026e-05	-8.21542
Croats	Ukrainians,Turks	-0.000255406	3.76398e-05	-6.78553
Macedonians	Belarusians,Tuscans	-0.000254011	5.78933e-05	-4.38758
Romanians	Turks,Bosnians	-0.000253638	4.2754e-05	-5.9325
Bulgarians	Turks,Serbians	-0.000252163	4.77388e-05	-5.28213
Greeks	Macedonians,Ethiopians	-0.000251003	5.93493e-05	-4.22925
Greeks	North_Italians,Ethiopians	-0.000250479	6.10203e-05	-4.10485
Romanians	Turks,French	-0.000249096	3.92514e-05	-6.34616
Macedonians	Ukrainians,Kosovars	-0.00024818	5.36367e-05	-4.62706
Tuscans	Hungarians,Ethiopians	-0.000248002	8.99412e-05	-2.75738
Romanians	Turks,Serbians	-0.000245988	4.01652e-05	-6.12441
Bulgarians	Turks,French	-0.000245643	4.56495e-05	-5.38106
Bulgarians	Hungarians,Greeks	-0.000245226	4.54987e-05	-5.38974
Bosnians	North_Italians,Belarusians	-0.000244452	4.80457e-05	-5.0879
Macedonians	Ukrainians,Greeks	-0.00024354	4.62036e-05	-5.27101
Hungarians	Ukrainians,Greeks	-0.000243506	3.82431e-05	-6.36732
French	Armenians,Poles	-0.000242912	4.48036e-05	-5.42169
French	Russians,Tuscans	-0.000242562	4.28753e-05	-5.65739
Italians	Armenians,Montenegrins	-0.000241923	3.66055e-05	-6.60892
Macedonians	Russians,Tuscans	-0.000240357	5.68805e-05	-4.22566
Romanians	Serbians,Armenians	-0.000240304	4.17838e-05	-5.75113
Armenians	Kosovars,Ethiopians	-0.0002383	6.88736e-05	-3.45997
Montenegrins	Belarusians,Ethiopians	-0.000238044	6.99299e-05	-3.40404
French	North_Italians,Poles	-0.000236815	4.25357e-05	-5.56743
Croats	Ukrainians,North_Italians	-0.00023613	3.93098e-05	-6.0069
Greeks	Ethiopians,Bulgarians	-0.000233157	5.79964e-05	-4.02019
Ukranians	Turks,Poles	-0.000232736	4.812e-05	-4.83658
Ukranians	Turks,Belarusians	-0.000231756	4.29473e-05	-5.39629
Serbians	Ukrainians,Tuscans	-0.000231486	4.85904e-05	-4.76402
Macedonians	Hungarians,Ethiopians	-0.00023124	6.60254e-05	-3.50229
Hungarians	Ukrainians,Turks	-0.000231082	4.25765e-05	-5.42745
Croats	Ukrainians,Tuscans	-0.000229342	4.71966e-05	-4.8593
Bulgarians	Turks,Bosnians	-0.00022839	4.83843e-05	-4.72034
Bulgarians	Greeks,Croats	-0.000228194	4.61975e-05	-4.93953
Italians	Armenians,Bosnians	-0.000227702	3.55763e-05	-6.40039
Tuscans	Belarusians,Armenians	-0.00022602	7.98934e-05	-2.82902
Bulgarians	Ethiopians,Montenegrins	-0.000223475	7.00036e-05	-3.19234
Croats	Ukrainians,Kosovars	-0.000222857	4.35057e-05	-5.12248
French	Italians_Abruzzo,Poles	-0.000220588	3.89308e-05	-5.66614
Ukranians	Russians,Italians_Abruzzo	-0.000220432	3.81957e-05	-5.77111
Romanians	Kosovars,Belarusians	-0.000220232	5.19396e-05	-4.24015
Serbians	North_Italians,Belarusians	-0.000219795	4.7106e-05	-4.66598
Romanians	Ethiopians,Bulgarians	-0.000219634	6.36991e-05	-3.448
Hungarians	Bulgarians,Poles	-0.000219267	4.78289e-05	-4.5844
Bulgarians	Kosovars,Croats	-0.000219231	5.31541e-05	-4.12445
French	Belarusians,Ethiopians	-0.000218672	5.50622e-05	-3.97137
Hungarians	French,Poles	-0.000218504	4.11012e-05	-5.31626
Tuscans	Ethiopians,Croats	-0.000216895	8.86394e-05	-2.44693
Serbians	Ukrainians,Turks	-0.000215952	4.04519e-05	-5.33848
Tuscans	Armenians,French	-0.000214305	7.39209e-05	-2.89912
Ukranians	Russians,North_Italians	-0.000213456	4.02609e-05	-5.30181
Macedonians	North_Italians,Poles	-0.000213446	5.74529e-05	-3.71514
Hungarians	Belarusians,French	-0.000213375	3.73157e-05	-5.71809
Bosnians	Russians,Turks	-0.000210248	4.41998e-05	-4.75678
Bosnians	Ukrainians,North_Italians	-0.000209602	4.45394e-05	-4.70598
Romanians	Kosovars,Poles	-0.000209046	5.66528e-05	-3.68994
Montenegrins	Russians,Armenians	-0.000205331	5.02019e-05	-4.0901
Ukranians	Russians,Kosovars	-0.000204902	4.34413e-05	-4.71675
Ukranians	Belarusians,Italians_Abruzzo	-0.000201582	4.07249e-05	-4.94986
French	Belarusians,Italians_Abruzzo	-0.000201531	3.38162e-05	-5.9596
Bulgarians	Kosovars,French	-0.000199545	5.08989e-05	-3.92042
Bulgarians	Serbians,Italians_Abruzzo	-0.00019889	4.39409e-05	-4.52631
Macedonians	Bosnians,Ethiopians	-0.00019844	6.71059e-05	-2.95712
Macedonians	Ukrainians,Tuscans	-0.000198165	5.52467e-05	-3.58691
Ukranians	Russians,Tuscans	-0.000195795	4.75121e-05	-4.12096
French	Tuscans,Poles	-0.000195028	5.31894e-05	-3.66667
Romanians	Ukrainians,Kosovars	-0.000193636	4.79788e-05	-4.03587
Croats	Bulgarians,Poles	-0.000193093	4.73267e-05	-4.08
Croats	Poles,Montenegrins	-0.000192991	4.66734e-05	-4.13492
Ukranians	Italians_Abruzzo,Poles	-0.000192839	4.62029e-05	-4.17374
Bulgarians	Tuscans,Croats	-0.000189491	5.64289e-05	-3.35805
Romanians	Turks,Montenegrins	-0.000186204	4.34018e-05	-4.29023
Croats	Belarusians,Montenegrins	-0.000185666	4.14694e-05	-4.47718
Hungarians	Russians,Bulgarians	-0.000185207	3.88035e-05	-4.77296
Romanians	North_Italians,Poles	-0.000184642	5.35748e-05	-3.44644
French	Belarusians,Armenians	-0.000183025	4.04104e-05	-4.52916
Ukranians	Russians,Greeks	-0.00018236	3.63653e-05	-5.01468
Macedonians	Armenians,Bosnians	-0.000181363	4.85789e-05	-3.73337
Hungarians	Belarusians,Bulgarians	-0.000179963	4.01979e-05	-4.47693
Bulgarians	Armenians,Montenegrins	-0.000179226	5.14252e-05	-3.48517
Italians	Macedonians,Armenians	-0.000179139	3.55013e-05	-5.046
Macedonians	Russians,Ethiopians	-0.000179081	6.66104e-05	-2.68849
Greeks	Kosovars,Turks	-0.000177427	4.44663e-05	-3.99015
Greeks	Turks,Poles	-0.000177024	4.72785e-05	-3.74428
Macedonians	Russians,North_Italians	-0.00017653	4.93933e-05	-3.57396
Serbians	Ethiopians,Croats	-0.000176454	5.46439e-05	-3.22916
Croats	Russians,Montenegrins	-0.000176074	3.85666e-05	-4.56544
Bosnians	Belarusians,Montenegrins	-0.000175988	4.86983e-05	-3.61384
French	North_Italians,Belarusians	-0.000175392	3.79328e-05	-4.62376
Greeks	Italians_Abruzzo,Poles	-0.000175324	4.35531e-05	-4.02552
Serbians	Belarusians,Montenegrins	-0.000174285	4.32019e-05	-4.03419
Romanians	Kosovars,Ethiopians	-0.000174096	7.08113e-05	-2.45859
Italians	Armenians,Bulgarians	-0.000173067	3.70682e-05	-4.66889
Ukranians	Russians,Armenians	-0.000172702	4.22444e-05	-4.08816
Hungarians	Romanians,Poles	-0.000171541	4.67299e-05	-3.67091
French	Belarusians,Tuscans	-0.000171311	4.55659e-05	-3.75962
Bosnians	Russians,Macedonians	-0.000171271	4.47276e-05	-3.8292
Hungarians	Belarusians,Montenegrins	-0.000171245	4.18256e-05	-4.09426
Hungarians	Russians,French	-0.000169966	3.45961e-05	-4.91286
Bulgarians	Bosnians,Greeks	-0.00016885	4.81281e-05	-3.50835
Hungarians	Russians,Macedonians	-0.000168504	3.86509e-05	-4.35963
Bulgarians	Turks,Macedonians	-0.000168219	4.98872e-05	-3.37199
Croats	Russians,Macedonians	-0.000167825	3.67047e-05	-4.57229
Romanians	Armenians,Montenegrins	-0.00016704	4.5307e-05	-3.68686
Hungarians	Russians,Turks	-0.000166407	4.02721e-05	-4.13208
Armenians	Bosnians,Ethiopians	-0.000166248	6.4197e-05	-2.58965
Ukranians	North_Italians,Poles	-0.000166193	4.99587e-05	-3.3266
Serbians	Kosovars,Hungarians	-0.00016566	4.6042e-05	-3.59803
Bosnians	Russians,Montenegrins	-0.00016504	4.49913e-05	-3.66827
Serbians	Poles,Montenegrins	-0.000164657	4.89482e-05	-3.3639
Hungarians	Ukrainians,Kosovars	-0.000164191	4.81138e-05	-3.41255
Croats	Romanians,Poles	-0.00016385	4.51341e-05	-3.63029
Greeks	Belarusians,Italians_Abruzzo	-0.000162111	3.91638e-05	-4.13932
Italians	North_Italians,Turks	-0.000161815	3.62655e-05	-4.46195
Serbians	Ukrainians,North_Italians	-0.00016178	4.37728e-05	-3.69591
Montenegrins	Russians,Kosovars	-0.000161127	5.35724e-05	-3.00765
Macedonians	Serbians,Armenians	-0.000161011	5.01239e-05	-3.21226
Macedonians	Italians_Abruzzo,Croats	-0.000159898	4.32673e-05	-3.69559
Ukranians	Belarusians,Tuscans	-0.000159685	5.09958e-05	-3.13133
Armenians	Ethiopians,Montenegrins	-0.000159604	6.50509e-05	-2.45353
Greeks	Kosovars,Armenians	-0.00015931	4.55228e-05	-3.49956
Turks	Armenians,Croats	-0.000159196	4.08485e-05	-3.89722
Bosnians	Kosovars,Hungarians	-0.00015887	5.23853e-05	-3.03273
Bulgarians	North_Italians,Bosnians	-0.000158795	5.26398e-05	-3.01664
Greeks	North_Italians,Armenians	-0.000158568	4.27344e-05	-3.71054
Bulgarians	Tuscans,Bosnians	-0.000158089	5.95979e-05	-2.6526
Greeks	Russians,Ethiopians	-0.000157788	6.04762e-05	-2.60909
Ukranians	Tuscans,Poles	-0.000155602	5.74391e-05	-2.70899
Bulgarians	French,Greeks	-0.000155476	4.30222e-05	-3.61386
Ukranians	Kosovars,Belarusians	-0.000155141	4.71134e-05	-3.29292
Hungarians	Poles,Montenegrins	-0.000155	4.70833e-05	-3.29203
Macedonians	Armenians,French	-0.000154923	4.65843e-05	-3.32564
Greeks	Turks,Belarusians	-0.000154087	4.47473e-05	-3.4435
Ukranians	Russians,Macedonians	-0.000153603	3.67729e-05	-4.17708
Croats	Russians,Turks	-0.0001533	3.85787e-05	-3.9737
Armenians	Ethiopians,Croats	-0.000152228	6.2207e-05	-2.44713
Bosnians	Russians,Ethiopians	-0.000151912	6.16247e-05	-2.46512
Ukranians	Belarusians,Greeks	-0.000151903	3.9778e-05	-3.81878
Bulgarians	Macedonians,Ethiopians	-0.000151546	6.84677e-05	-2.2134
Romanians	North_Italians,Belarusians	-0.000151212	4.81918e-05	-3.13772
Croats	Russians,Bulgarians	-0.000150793	3.62313e-05	-4.16196
Greeks	Russians,Italians_Abruzzo	-0.000150504	3.71303e-05	-4.05339
Romanians	Turks,Macedonians	-0.000150384	4.2357e-05	-3.5504
Bosnians	Russians,Bulgarians	-0.000150251	4.38063e-05	-3.4299
Bulgarians	Turks,Montenegrins	-0.000149451	4.91753e-05	-3.03914
Bosnians	Kosovars,Croats	-0.000149214	4.88423e-05	-3.05501
Armenians	Macedonians,Ethiopians	-0.000149171	6.44831e-05	-2.31333
Turks	Armenians,Hungarians	-0.000148753	4.17381e-05	-3.56397
Romanians	Italians_Abruzzo,Croats	-0.000147979	3.90247e-05	-3.79194
Romanians	Ukrainians,North_Italians	-0.000147187	4.46432e-05	-3.29696
French	Ukrainians,North_Italians	-0.000146884	3.35838e-05	-4.37366
Croats	Ukrainians,Montenegrins	-0.000146856	3.80125e-05	-3.86336
Tuscans	North_Italians,Ethiopians	-0.000146776	9.44346e-05	-1.55426
Bosnians	Ukrainians,Montenegrins	-0.000146713	4.57957e-05	-3.20363
Romanians	North_Italians,Ethiopians	-0.000146395	6.67977e-05	-2.19162
Hungarians	Russians,Montenegrins	-0.000146323	3.85758e-05	-3.79312
Serbians	Armenians,Croats	-0.000145785	4.07511e-05	-3.57744
Ukranians	Russians,Bulgarians	-0.000145457	3.90355e-05	-3.72628
Macedonians	North_Italians,Belarusians	-0.000145409	5.30973e-05	-2.73853
Hungarians	Ukrainians,French	-0.000144736	3.59329e-05	-4.02795
Ukranians	Kosovars,Poles	-0.000144146	5.32689e-05	-2.70601
Serbians	Armenians,Hungarians	-0.000143964	4.4187e-05	-3.25806
Montenegrins	Ukrainians,Armenians	-0.000142971	5.11011e-05	-2.7978
Macedonians	Kosovars,Hungarians	-0.000142582	5.29728e-05	-2.69161
Bosnians	Bulgarians,Poles	-0.000142521	5.39217e-05	-2.64311
Greeks	Turks,Montenegrins	-0.000142008	3.94235e-05	-3.60211
Italians	Turks,French	-0.000140093	3.19095e-05	-4.39031
Montenegrins	Italians_Abruzzo,Poles	-0.000139505	5.49752e-05	-2.5376
Bosnians	Armenians,Croats	-0.000139478	4.60978e-05	-3.0257
Greeks	Turks,Serbians	-0.000139328	3.73504e-05	-3.7303
Hungarians	Belarusians,Romanians	-0.000138419	4.15631e-05	-3.33033
Ukranians	Bulgarians,Poles	-0.000138319	4.73419e-05	-2.9217
Bulgarians	Serbians,Greeks	-0.000137532	4.53806e-05	-3.03063
Tuscans	Bosnians,Ethiopians	-0.000136661	9.15078e-05	-1.49343
Greeks	Armenians,Bulgarians	-0.000135517	4.03702e-05	-3.35687
Montenegrins	Russians,Italians_Abruzzo	-0.000134577	4.68558e-05	-2.87215
Bulgarians	Macedonians,Greeks	-0.0001337	4.71943e-05	-2.83297
Macedonians	Serbians,Ethiopians	-0.000133399	6.49105e-05	-2.05512
French	Russians,Armenians	-0.000133338	3.67288e-05	-3.63033
Croats	Macedonians,Poles	-0.000133084	4.55722e-05	-2.92028
Montenegrins	Kosovars,Poles	-0.000132892	6.44788e-05	-2.06102
Macedonians	Bosnians,Italians_Abruzzo	-0.0001328	4.35555e-05	-3.04899
Ukranians	North_Italians,Belarusians	-0.00013257	4.40023e-05	-3.01281
Serbians	Russians,Montenegrins	-0.000132504	4.07012e-05	-3.25553
Ukranians	Belarusians,Bulgarians	-0.000131945	4.13571e-05	-3.19039
Bosnians	Poles,Montenegrins	-0.000131927	5.38133e-05	-2.45157
Romanians	Italians_Abruzzo,Hungarians	-0.000131545	3.95018e-05	-3.3301
Bosnians	Belarusians,Bulgarians	-0.000131032	4.7029e-05	-2.7862
Croats	Belarusians,Bulgarians	-0.00013022	4.01041e-05	-3.24704
Armenians	Ethiopians,Poles	-0.000129996	7.97505e-05	-1.63003
Ukranians	Greeks,Poles	-0.000129947	4.64048e-05	-2.80029
Ukranians	Romanians,Poles	-0.000128737	4.56151e-05	-2.82224
Ukranians	Belarusians,Romanians	-0.000128545	3.997e-05	-3.21604
Romanians	Bosnians,Italians_Abruzzo	-0.000128482	3.98777e-05	-3.22191
Macedonians	Italians_Abruzzo,Hungarians	-0.000128212	4.35014e-05	-2.94731
Tuscans	Ukrainians,Armenians	-0.000128175	7.86954e-05	-1.62874
Hungarians	Macedonians,Belarusians	-0.000127007	4.06426e-05	-3.12498
Ukranians	Belarusians,Montenegrins	-0.000126996	4.13563e-05	-3.07077
Bulgarians	North_Italians,Macedonians	-0.000126861	5.08416e-05	-2.49523
Hungarians	Macedonians,Poles	-0.000125523	4.56603e-05	-2.74905
Bosnians	Ethiopians,Croats	-0.000125459	5.94832e-05	-2.10915
Tuscans	Ethiopians,Montenegrins	-0.000124962	9.27344e-05	-1.34753
Bosnians	Romanians,Poles	-0.000124867	5.12048e-05	-2.43858
Serbians	Russians,Ethiopians	-0.000124267	5.7846e-05	-2.14824
Armenians	Belarusians,Ethiopians	-0.000124144	7.00208e-05	-1.77296
Bulgarians	North_Italians,Serbians	-0.000123096	4.96116e-05	-2.4812
Serbians	Kosovars,Croats	-0.000122697	4.38555e-05	-2.79776
Serbians	Hungarians,Ethiopians	-0.000122656	5.80623e-05	-2.1125
Bulgarians	North_Italians,Croats	-0.000121919	4.95176e-05	-2.46214
Serbians	Ukrainians,Montenegrins	-0.000121844	4.05297e-05	-3.00629
Armenians	Serbians,Ethiopians	-0.000121559	6.25372e-05	-1.94378
Macedonians	Kosovars,Croats	-0.000120669	5.0563e-05	-2.3865
Bosnians	Belarusians,Romanians	-0.00011956	4.58494e-05	-2.60767
Greeks	Macedonians,Armenians	-0.000119548	4.08249e-05	-2.92832
Armenians	Ukrainians,Ethiopians	-0.00011786	6.60499e-05	-1.78441
Bulgarians	Macedonians,Armenians	-0.000117731	5.19929e-05	-2.26436
Italians	Tuscans,Armenians	-0.000117428	4.28878e-05	-2.73804
Bulgarians	Tuscans,Hungarians	-0.000117271	5.46176e-05	-2.14713
Tuscans	Serbians,Ethiopians	-0.000117032	9.23182e-05	-1.2677
Macedonians	Ukrainians,North_Italians	-0.000116677	4.90231e-05	-2.38004
Serbians	Bulgarians,Poles	-0.000116598	5.1798e-05	-2.25101
Hungarians	Russians,Ethiopians	-0.000116345	5.69943e-05	-2.04134
Bosnians	Macedonians,Belarusians	-0.0001158	4.57278e-05	-2.53237
French	Ukrainians,Tuscans	-0.000115689	4.14068e-05	-2.79395
Armenians	Ethiopians,Bulgarians	-0.000115355	6.53128e-05	-1.76619
Greeks	Turks,French	-0.000114864	3.54807e-05	-3.23737
Hungarians	Russians,Serbians	-0.000114734	3.64312e-05	-3.14935
Greeks	Kosovars,Italians_Abruzzo	-0.000114596	3.97857e-05	-2.88033
Bulgarians	Serbians,Tuscans	-0.000114175	5.54781e-05	-2.05802
Greeks	Ukrainians,Italians_Abruzzo	-0.000112432	3.52429e-05	-3.19021
Bulgarians	Macedonians,Italians_Abruzzo	-0.000111658	4.61397e-05	-2.42001
Croats	Macedonians,Belarusians	-0.000110999	4.17968e-05	-2.65567
Bulgarians	Italians_Abruzzo,Montenegrins	-0.00011037	4.73523e-05	-2.33082
Ukranians	Russians,Montenegrins	-0.000110341	3.7304e-05	-2.9579
Bosnians	Ukrainians,Macedonians	-0.000109681	4.35055e-05	-2.52109
Armenians	North_Italians,Ethiopians	-0.000109628	6.57766e-05	-1.66666
Romanians	Tuscans,Croats	-0.000108422	5.0733e-05	-2.13711
Croats	Belarusians,Romanians	-0.000107158	3.99227e-05	-2.68414
Bulgarians	Macedonians,Tuscans	-0.000106158	5.79498e-05	-1.83189
Tuscans	Russians,Armenians	-0.000105081	7.92001e-05	-1.32678
Bosnians	Armenians,Hungarians	-0.00010435	4.76004e-05	-2.19221
Ukranians	Belarusians,French	-0.000104063	3.60515e-05	-2.88651
French	Ukrainians,Italians_Abruzzo	-0.000104011	3.11644e-05	-3.33751
Ukranians	Macedonians,Belarusians	-0.000103839	3.91672e-05	-2.65117
Bosnians	Russians,Serbians	-0.000101425	4.22421e-05	-2.40104
Montenegrins	Ukrainians,Ethiopians	-0.000101226	6.63542e-05	-1.52555
Serbians	Hungarians,Montenegrins	-0.000100916	3.93931e-05	-2.56177
Armenians	Hungarians,Ethiopians	-0.000100251	6.47817e-05	-1.54752
Ukranians	Russians,Serbians	-9.96813e-05	3.7378e-05	-2.66685
Montenegrins	Belarusians,Italians_Abruzzo	-9.90737e-05	5.05258e-05	-1.96085
Macedonians	Turks,Croats	-9.84964e-05	4.6931e-05	-2.09875
Hungarians	Serbians,Belarusians	-9.78763e-05	3.81495e-05	-2.5656
Bulgarians	Kosovars,Serbians	-9.78089e-05	5.29359e-05	-1.84768
Ukranians	Belarusians,Bosnians	-9.77205e-05	3.89777e-05	-2.50709
Bulgarians	Macedonians,French	-9.69693e-05	4.46675e-05	-2.17091
Bosnians	Ukrainians,Bulgarians	-9.68076e-05	4.49575e-05	-2.15331
Turks	Armenians,French	-9.64166e-05	4.06994e-05	-2.36899
Serbians	Hungarians,Greeks	-9.62841e-05	3.76984e-05	-2.55407
Bulgarians	North_Italians,Hungarians	-9.593e-05	5.16724e-05	-1.8565
Croats	Ukrainians,Macedonians	-9.53453e-05	3.69212e-05	-2.5824
Serbians	Russians,Turks	-9.52877e-05	4.26198e-05	-2.23576
Montenegrins	Kosovars,Belarusians	-9.47112e-05	5.79193e-05	-1.63523
Macedonians	French,Ethiopians	-9.42487e-05	6.18139e-05	-1.52472
Bosnians	Ukrainians,Serbians	-9.37573e-05	4.12621e-05	-2.27224
Kosovars	Armenians,Poles	-9.34688e-05	7.70365e-05	-1.21331
Serbians	Italians_Abruzzo,Croats	-9.31066e-05	3.58407e-05	-2.59779
Croats	Russians,Serbians	-9.30053e-05	3.5403e-05	-2.62705
Ukranians	Bosnians,Poles	-9.26059e-05	4.34045e-05	-2.13356
Ukranians	Russians,Bosnians	-9.20137e-05	3.56859e-05	-2.57843
Serbians	Greeks,Croats	-9.1937e-05	3.6755e-05	-2.50135
Hungarians	Serbians,Poles	-9.12591e-05	4.38735e-05	-2.08005
Turks	Armenians,Bosnians	-9.10306e-05	4.22988e-05	-2.15209
Bulgarians	Kosovars,Romanians	-9.06424e-05	5.61819e-05	-1.61337
Bosnians	Ukrainians,Romanians	-8.87358e-05	4.11562e-05	-2.15608
Romanians	Tuscans,Bosnians	-8.86088e-05	5.3068e-05	-1.66972
Armenians	French,Ethiopians	-8.84968e-05	6.20779e-05	-1.42558
Ukranians	Belarusians,Croats	-8.81855e-05	3.70514e-05	-2.38008
Croats	French,Poles	-8.72824e-05	4.11342e-05	-2.12189
Greeks	Turks,Hungarians	-8.6659e-05	3.80197e-05	-2.27932
Bosnians	Macedonians,Poles	-8.64996e-05	5.41272e-05	-1.59808
Croats	Ukrainians,Bulgarians	-8.64597e-05	3.69288e-05	-2.34126
Poles	Russians,Macedonians	-8.62815e-05	6.32585e-05	-1.36395
Macedonians	Turks,Hungarians	-8.60679e-05	4.6421e-05	-1.85407
Bulgarians	Macedonians,Hungarians	-8.56137e-05	4.74502e-05	-1.80429
Greeks	Kosovars,Tuscans	-8.43889e-05	5.56466e-05	-1.51652
Greeks	Turks,Bosnians	-8.42376e-05	4.04506e-05	-2.08248
Macedonians	Russians,Turks	-8.39716e-05	4.79268e-05	-1.75208
Bulgarians	Kosovars,Bosnians	-8.38396e-05	5.62722e-05	-1.48989
Hungarians	Ukrainians,Bulgarians	-8.34419e-05	3.90913e-05	-2.13454
Serbians	Italians_Abruzzo,Hungarians	-8.24706e-05	3.73231e-05	-2.20964
Greeks	Turks,Croats	-8.23844e-05	3.67129e-05	-2.24402
Ukranians	Russians,Croats	-8.11238e-05	3.35002e-05	-2.42159
Greeks	North_Italians,Turks	-8.11228e-05	4.11019e-05	-1.9737
Bulgarians	Macedonians,Romanians	-8.09229e-05	4.6686e-05	-1.73334
Hungarians	Ukrainians,Montenegrins	-7.9673e-05	3.94313e-05	-2.02055
Romanians	Greeks,Croats	-7.94808e-05	3.92433e-05	-2.02534
Bulgarians	Kosovars,Macedonians	-7.9397e-05	5.57017e-05	-1.4254
Hungarians	Russians,Romanians	-7.92509e-05	3.91781e-05	-2.02284
Bulgarians	North_Italians,Montenegrins	-7.87893e-05	5.09404e-05	-1.5467
Serbians	Russians,Macedonians	-7.85841e-05	4.12382e-05	-1.90562
Romanians	Hungarians,Greeks	-7.80298e-05	3.95792e-05	-1.97148
Ukranians	Poles,Montenegrins	-7.78205e-05	4.87476e-05	-1.5964
Croats	Serbians,Poles	-7.77698e-05	4.34987e-05	-1.78787
Ukranians	Russians,Romanians	-7.7645e-05	3.66368e-05	-2.11932
North	Ethiopians,Poles	-7.71302e-05	8.53068e-05	-0.904151
Serbians	Tuscans,Croats	-7.65915e-05	4.6955e-05	-1.63117
Ukranians	French,Poles	-7.62625e-05	4.18698e-05	-1.82142
Macedonians	Greeks,Croats	-7.53288e-05	4.42327e-05	-1.70301
Greeks	Bosnians,Italians_Abruzzo	-7.52651e-05	3.53216e-05	-2.13085
Bulgarians	Italians_Abruzzo,French	-7.51162e-05	4.24481e-05	-1.7696
Romanians	Kosovars,Hungarians	-7.47431e-05	4.88634e-05	-1.52964
Ukranians	Serbians,Belarusians	-7.45552e-05	3.82931e-05	-1.94696
Croats	Ukrainians,Serbians	-7.44478e-05	3.46496e-05	-2.14859
Bosnians	Russians,Romanians	-7.4367e-05	4.2822e-05	-1.73666
Greeks	Ukrainians,Turks	-7.42346e-05	3.91151e-05	-1.89785
Serbians	Bosnians,Ethiopians	-7.37796e-05	5.95939e-05	-1.23804
Tuscans	Armenians,Hungarians	-7.34855e-05	7.63527e-05	-0.962448
Bosnians	Greeks,Croats	-7.31661e-05	4.1188e-05	-1.77639
North	Belarusians,Ethiopians	-7.28146e-05	7.66512e-05	-0.949947
Bosnians	Turks,Croats	-7.13129e-05	4.29172e-05	-1.66164
Serbians	Bosnians,Italians_Abruzzo	-7.09822e-05	3.89283e-05	-1.82341
Serbians	Belarusians,Bulgarians	-7.0677e-05	4.23742e-05	-1.66793
Bosnians	Serbians,Belarusians	-7.0592e-05	4.40084e-05	-1.60406
Macedonians	Serbians,Italians_Abruzzo	-7.05564e-05	4.45845e-05	-1.58253
Ukranians	Macedonians,Poles	-6.94241e-05	4.62479e-05	-1.50113
Bulgarians	Serbians,Romanians	-6.92626e-05	4.69783e-05	-1.47435
Ukranians	Russians,French	-6.89219e-05	3.37932e-05	-2.03952
Bulgarians	Russians,Macedonians	-6.89101e-05	5.08159e-05	-1.35607
Serbians	Bosnians,Montenegrins	-6.88888e-05	4.07553e-05	-1.6903
Bulgarians	Hungarians,Romanians	-6.79126e-05	4.68826e-05	-1.44857
Serbians	Romanians,Poles	-6.75219e-05	4.80903e-05	-1.40406
Macedonians	Turks,Serbians	-6.7268e-05	4.77076e-05	-1.41001
Croats	Ukrainians,Romanians	-6.67988e-05	3.68211e-05	-1.81414
Poles	Russians,Serbians	-6.67758e-05	6.23927e-05	-1.07025
Italians	Kosovars,Armenians	-6.67435e-05	4.2618e-05	-1.56609
Montenegrins	Ukrainians,Kosovars	-6.65664e-05	5.55789e-05	-1.19769
Italians	Armenians,Romanians	-6.56041e-05	3.42443e-05	-1.91577
Croats	Bosnians,Poles	-6.43945e-05	4.32194e-05	-1.48994
Macedonians	Tuscans,Croats	-6.41682e-05	5.45204e-05	-1.17696
Croats	Russians,Romanians	-6.332e-05	3.72095e-05	-1.70171
Romanians	Turks,Bulgarians	-6.30881e-05	4.31453e-05	-1.46222
Poles	Russians,Kosovars	-6.28582e-05	6.88585e-05	-0.91286
Greeks	Italians_Abruzzo,Montenegrins	-6.2709e-05	3.55662e-05	-1.76316
Montenegrins	Turks,Poles	-6.19063e-05	5.98084e-05	-1.03508
Poles	Russians,Belarusians	-6.08864e-05	6.20392e-05	-0.981417
Croats	Serbians,Belarusians	-6.08175e-05	3.8554e-05	-1.57746
Bulgarians	Ukrainians,Macedonians	-6.07643e-05	5.06805e-05	-1.19897
Bulgarians	French,Romanians	-5.96347e-05	4.41856e-05	-1.34964
Greeks	Turks,Macedonians	-5.92169e-05	3.89957e-05	-1.51855
Serbians	Macedonians,Poles	-5.90785e-05	4.89915e-05	-1.20589
Serbians	Russians,Bulgarians	-5.90629e-05	4.15248e-05	-1.42235
French	Ukrainians,Ethiopians	-5.89214e-05	5.18186e-05	-1.13707
Hungarians	Ukrainians,Serbians	-5.8745e-05	3.84299e-05	-1.52863
Macedonians	Hungarians,Greeks	-5.86258e-05	4.40881e-05	-1.32974
Bosnians	Belarusians,French	-5.8619e-05	4.15844e-05	-1.40964
Italians	Turks,Tuscans	-5.86024e-05	4.15178e-05	-1.4115
Hungarians	Ukrainians,Macedonians	-5.85924e-05	4.08428e-05	-1.43458
Croats	Belarusians,French	-5.85831e-05	3.69387e-05	-1.58595
North	Belarusians,Armenians	-5.82984e-05	5.70405e-05	-1.02205
Bulgarians	Greeks,Romanians	-5.77026e-05	4.72669e-05	-1.22078
North	Armenians,Poles	-5.67622e-05	6.31538e-05	-0.898793
Macedonians	Kosovars,French	-5.58923e-05	5.12839e-05	-1.08986
Bulgarians	Macedonians,Montenegrins	-5.46288e-05	4.96197e-05	-1.10095
Poles	Russians,Greeks	-5.45156e-05	6.32845e-05	-0.861437
Serbians	Tuscans,Bosnians	-5.4151e-05	5.00379e-05	-1.0822
Turks	Armenians,Romanians	-5.40881e-05	4.04978e-05	-1.33558
Serbians	Macedonians,Belarusians	-5.39459e-05	4.36948e-05	-1.23461
Bulgarians	North_Italians,Romanians	-5.3053e-05	5.05884e-05	-1.04872
Bosnians	Ukrainians,French	-5.22768e-05	3.88771e-05	-1.34467
Bulgarians	Macedonians,Croats	-5.18787e-05	4.82918e-05	-1.07427
Bulgarians	Italians_Abruzzo,Romanians	-5.17321e-05	4.53631e-05	-1.1404
Poles	Russians,Croats	-5.15403e-05	5.89214e-05	-0.87473
Bulgarians	Kosovars,Turks	-5.10955e-05	5.47427e-05	-0.933377
Romanians	Macedonians,Armenians	-5.09577e-05	4.56827e-05	-1.11547
North	Armenians,French	-5.06652e-05	5.02601e-05	-1.00806
Kosovars	Belarusians,Armenians	-5.03885e-05	7.17975e-05	-0.701813
Macedonians	Ethiopians,Montenegrins	-5.00134e-05	6.97899e-05	-0.716629
Serbians	Croats,Montenegrins	-4.94359e-05	3.94749e-05	-1.25234
Bulgarians	Romanians,Croats	-4.94295e-05	4.65993e-05	-1.06073
Bulgarians	Macedonians,Serbians	-4.93888e-05	4.72334e-05	-1.04563
Poles	Russians,North_Italians	-4.93656e-05	6.63854e-05	-0.743621
Turks	Serbians,Armenians	-4.84041e-05	4.24965e-05	-1.13901
Bulgarians	Macedonians,Bosnians	-4.78905e-05	4.94601e-05	-0.968266
Greeks	Italians_Abruzzo,Croats	-4.70074e-05	3.38855e-05	-1.38724
Montenegrins	Russians,Greeks	-4.67826e-05	4.55453e-05	-1.02717
Bosnians	Turks,Hungarians	-4.66278e-05	4.48926e-05	-1.03865
Serbians	North_Italians,Bosnians	-4.59358e-05	4.32204e-05	-1.06283
Greeks	Serbians,Italians_Abruzzo	-4.58378e-05	3.38579e-05	-1.35383
Hungarians	Ukrainians,Romanians	-4.52978e-05	4.14995e-05	-1.09153
Bosnians	Tuscans,Croats	-4.52246e-05	5.16435e-05	-0.875707
Bulgarians	Kosovars,Ethiopians	-4.51039e-05	7.71634e-05	-0.584525
Macedonians	Turks,Bosnians	-4.4994e-05	4.81293e-05	-0.934857
Bosnians	Italians_Abruzzo,Croats	-4.49084e-05	4.11354e-05	-1.09172
Hungarians	Bosnians,Poles	-4.4577e-05	4.63946e-05	-0.960823
Bosnians	Hungarians,Greeks	-4.42065e-05	4.33586e-05	-1.01955
Russians	Ethiopians,Poles	-4.38961e-05	7.04953e-05	-0.62268
Ukranians	Russians,Hungarians	-4.36919e-05	3.43045e-05	-1.27365
Serbians	Turks,Hungarians	-4.36147e-05	4.04512e-05	-1.07821
Poles	Russians,Hungarians	-4.33004e-05	6.24425e-05	-0.693444
Croats	Ukrainians,French	-4.27058e-05	3.32247e-05	-1.28536
Poles	Russians,Tuscans	-4.2296e-05	7.32737e-05	-0.577232
Serbians	Bosnians,Greeks	-4.1555e-05	3.81896e-05	-1.08812
Macedonians	Bulgarians,Poles	-4.08441e-05	5.58287e-05	-0.731596
Croats	Russians,Ethiopians	-4.08178e-05	5.72594e-05	-0.712857
Serbians	French,Montenegrins	-4.07733e-05	3.7286e-05	-1.09353
Serbians	Macedonians,Montenegrins	-4.01204e-05	4.08295e-05	-0.982632
Macedonians	Armenians,Montenegrins	-3.95797e-05	5.32481e-05	-0.743307
Bosnians	Hungarians,Ethiopians	-3.8354e-05	6.18751e-05	-0.619862
Bulgarians	Bosnians,Romanians	-3.78404e-05	4.85035e-05	-0.780157
Romanians	Kosovars,Croats	-3.75782e-05	4.60351e-05	-0.816294
Macedonians	Tuscans,Bosnians	-3.67541e-05	5.62463e-05	-0.65345
Romanians	Serbians,Italians_Abruzzo	-3.63144e-05	3.9e-05	-0.93114
Bosnians	Serbians,Poles	-3.61594e-05	5.07052e-05	-0.71313
Bosnians	French,Poles	-3.59334e-05	4.73511e-05	-0.758871
Ukranians	Belarusians,Hungarians	-3.54239e-05	3.60828e-05	-0.98174
Ukranians	Serbians,Poles	-3.50079e-05	4.43752e-05	-0.788907
Serbians	Turks,Croats	-3.49931e-05	3.9031e-05	-0.896544
Turks	Armenians,Montenegrins	-3.4925e-05	4.38033e-05	-0.797315
Serbians	Bulgarians,Montenegrins	-3.48804e-05	4.25064e-05	-0.820591
Poles	Russians,Montenegrins	-3.46233e-05	6.44903e-05	-0.536877
Bulgarians	Macedonians,Belarusians	-3.26578e-05	5.16075e-05	-0.63281
French	North_Italians,Hungarians	-3.25188e-05	3.43451e-05	-0.946826
Bulgarians	Greeks,Montenegrins	-3.21404e-05	4.75478e-05	-0.675959
Greeks	Italians_Abruzzo,Hungarians	-3.20243e-05	3.42917e-05	-0.933879
Romanians	Bosnians,Greeks	-3.17262e-05	4.1906e-05	-0.757081
Ukranians	Croats,Poles	-3.16859e-05	4.23648e-05	-0.747929
Croats	Russians,French	-3.05039e-05	3.36176e-05	-0.90738
Bulgarians	Ukrainians,Romanians	-2.97686e-05	4.86978e-05	-0.611291
Poles	Russians,Italians_Abruzzo	-2.96952e-05	6.39174e-05	-0.464586
French	Ukrainians,Armenians	-2.95578e-05	3.69784e-05	-0.799328
North	French,Ethiopians	-2.95344e-05	6.65171e-05	-0.444013
Bulgarians	French,Montenegrins	-2.94429e-05	4.54221e-05	-0.648207
Bosnians	Russians,French	-2.9185e-05	3.87895e-05	-0.752392
Serbians	Armenians,Bosnians	-2.90907e-05	4.38912e-05	-0.662792
Romanians	North_Italians,Turks	-2.89514e-05	4.59563e-05	-0.629977
Bulgarians	Kosovars,Italians_Abruzzo	-2.84821e-05	5.403e-05	-0.527154
Bulgarians	North_Italians,Kosovars	-2.84551e-05	5.94153e-05	-0.47892
Bulgarians	Tuscans,Montenegrins	-2.8099e-05	5.97867e-05	-0.469987
Serbians	Belarusians,Romanians	-2.77827e-05	4.34078e-05	-0.640039
Montenegrins	Greeks,Poles	-2.68903e-05	5.49324e-05	-0.489516
Bulgarians	Belarusians,Romanians	-2.63683e-05	5.15425e-05	-0.511582
Bulgarians	Romanians,Montenegrins	-2.63354e-05	4.95737e-05	-0.531237
Romanians	North_Italians,Bosnians	-2.63209e-05	4.71838e-05	-0.557838
Italians	Turks,Macedonians	-2.6127e-05	3.54226e-05	-0.73758
Bosnians	Romanians,Croats	-2.54115e-05	4.24901e-05	-0.598057
Serbians	Macedonians,Hungarians	-2.48149e-05	3.93019e-05	-0.631392
Greeks	Turks,Bulgarians	-2.46975e-05	3.99798e-05	-0.61775
Serbians	Ukrainians,Macedonians	-2.46623e-05	4.01716e-05	-0.613923
Montenegrins	Ukrainians,Italians_Abruzzo	-2.4487e-05	4.68702e-05	-0.522443
Belarusians	Ethiopians,Poles	-2.40556e-05	8.07731e-05	-0.297817
Bulgarians	Serbians,French	-2.355e-05	4.38844e-05	-0.536638
Romanians	Kosovars,Turks	-2.35412e-05	4.84134e-05	-0.486254
Italians	Turks,Serbians	-2.28387e-05	3.42957e-05	-0.665936
Bosnians	Serbians,Croats	-2.27841e-05	4.03196e-05	-0.565088
Greeks	Armenians,Romanians	-2.20837e-05	4.05441e-05	-0.544684
Italians	Armenians,Greeks	-2.20294e-05	3.43926e-05	-0.640526
Bosnians	Hungarians,Montenegrins	-2.15045e-05	4.65604e-05	-0.461863
Bulgarians	Romanians,Poles	-2.01865e-05	5.52926e-05	-0.365084
Macedonians	Bosnians,Greeks	-1.99732e-05	4.62422e-05	-0.431927
Belarusians	North_Italians,Poles	-1.974e-05	5.84752e-05	-0.33758
Bulgarians	North_Italians,Turks	-1.89163e-05	5.27649e-05	-0.358502
Belarusians	Armenians,Poles	-1.82039e-05	6.28681e-05	-0.289557
Bosnians	Macedonians,Croats	-1.78105e-05	4.30537e-05	-0.413682
Romanians	Tuscans,Hungarians	-1.77187e-05	5.03602e-05	-0.351839
Armenians	Ethiopians,Greeks	-1.77157e-05	5.68721e-05	-0.311502
Hungarians	Belarusians,Bosnians	-1.67615e-05	4.06851e-05	-0.411982
Macedonians	North_Italians,Bosnians	-1.67568e-05	5.05876e-05	-0.331243
Bulgarians	Kosovars,Tuscans	-1.64326e-05	6.59592e-05	-0.249132
Serbians	Kosovars,French	-1.44122e-05	4.40124e-05	-0.327458
Croats	Russians,Bosnians	-1.43645e-05	3.45519e-05	-0.415735
Romanians	Armenians,Bulgarians	-1.41501e-05	4.49479e-05	-0.314812
Hungarians	French,Croats	-1.40542e-05	3.48171e-05	-0.403658
Bosnians	Bulgarians,Croats	-1.38224e-05	4.43917e-05	-0.311374
Bulgarians	Hungarians,Montenegrins	-1.36715e-05	4.85372e-05	-0.281671
Serbians	Ukrainians,Bulgarians	-1.32869e-05	4.10805e-05	-0.323435
Romanians	Serbians,Tuscans	-1.32722e-05	4.96338e-05	-0.267403
Macedonians	Turks,French	-1.31675e-05	4.46758e-05	-0.294735
Bosnians	French,Croats	-1.30455e-05	3.88825e-05	-0.335512
Croats	Belarusians,Bosnians	-1.30096e-05	3.7923e-05	-0.343053
Montenegrins	Turks,Belarusians	-1.17507e-05	5.37887e-05	-0.218461
French	Turks,Poles	-1.15432e-05	4.38189e-05	-0.263429
Croats	Hungarians,Montenegrins	-1.14696e-05	3.71314e-05	-0.308893
Bosnians	Kosovars,French	-1.14615e-05	4.76892e-05	-0.240337
Serbians	Bosnians,Bulgarians	-1.02366e-05	4.1583e-05	-0.246173
Bulgarians	Ukrainians,Montenegrins	-9.90264e-06	4.92141e-05	-0.201216
Poles	Russians,Bulgarians	-9.24077e-06	6.58986e-05	-0.140227
Turks	Armenians,Ethiopians	-9.16193e-06	5.68024e-05	-0.161295
French	Russians,Greeks	-9.1371e-06	3.24555e-05	-0.281527
Serbians	Macedonians,Bosnians	-8.73828e-06	4.13259e-05	-0.211448
Italians	Turks,Montenegrins	-8.64711e-06	3.51566e-05	-0.24596
Belarusians	Russians,North_Italians	-8.21925e-06	4.8457e-05	-0.169619
Romanians	Kosovars,French	-7.68708e-06	4.59657e-05	-0.167235
Bosnians	Macedonians,Hungarians	-5.55388e-06	4.38987e-05	-0.126516
Turks	Armenians,Bulgarians	-5.1502e-06	4.19576e-05	-0.122748
Bulgarians	Belarusians,Montenegrins	-4.95307e-06	5.06706e-05	-0.0977503
Serbians	Macedonians,Croats	-3.76473e-06	3.78499e-05	-0.0994648
Croats	Ukrainians,Bosnians	-3.47455e-06	3.50083e-05	-0.0992493
Bosnians	Croats,Montenegrins	-3.33117e-06	4.45894e-05	-0.0747077
Croats	Kosovars,Hungarians	-2.95263e-06	4.57589e-05	-0.0645258
Hungarians	Russians,Bosnians	-2.78679e-06	3.75148e-05	-0.074285
Ukranians	Hungarians,Poles	-2.49388e-06	4.24062e-05	-0.0588093
Poles	Ukrainians,Russians	-2.10243e-06	5.98387e-05	-0.0351349
Macedonians	Kosovars,Serbians	-1.7364e-06	5.31568e-05	-0.0326657
Poles	Russians,Bosnians	-1.51024e-06	6.30185e-05	-0.023965
Serbians	Bulgarians,Croats	-1.27492e-06	3.85638e-05	-0.03306
Bosnians	Italians_Abruzzo,Hungarians	-9.65678e-07	4.32113e-05	-0.0223478
Serbians	North_Italians,Croats	-9.78763e-08	3.99709e-05	-0.00244869
Macedonians	Belarusians,Bulgarians	-5.56476e-08	5.09904e-05	-0.00109134
Montenegrins	Belarusians,Greeks	3.28671e-07	4.86612e-05	0.00675428
Greeks	North_Italians,Kosovars	1.67595e-06	4.71371e-05	0.0355548
Bosnians	Hungarians,Romanians	2.09709e-06	4.2253e-05	0.0496318
Croats	North_Italians,Bosnians	2.88469e-06	4.11482e-05	0.070105
Hungarians	Belarusians,Croats	2.95178e-06	3.864e-05	0.0763917
Romanians	French,Greeks	3.44226e-06	3.88098e-05	0.0886957
Romanians	Russians,Bulgarians	3.53719e-06	4.11214e-05	0.0860182
Serbians	Kosovars,Bosnians	3.7327e-06	4.79841e-05	0.0777904
Poles	Russians,French	5.23821e-06	6.04626e-05	0.0866354
Romanians	Macedonians,Tuscans	6.40495e-06	5.18347e-05	0.123565
Bosnians	Serbians,French	6.68342e-06	4.0191e-05	0.166291
Croats	Bosnians,Hungarians	6.70372e-06	3.61722e-05	0.185328
Belarusians	Bulgarians,Poles	7.50841e-06	5.5498e-05	0.135291
Italians	Kosovars,Turks	7.82042e-06	4.0513e-05	0.193035
Serbians	Romanians,Montenegrins	8.04686e-06	4.2789e-05	0.188059
Bulgarians	Macedonians,Poles	8.13065e-06	5.79069e-05	0.140409
Serbians	Tuscans,Hungarians	8.31351e-06	4.89984e-05	0.169669
Montenegrins	Russians,Tuscans	8.6572e-06	5.78579e-05	0.149629
Macedonians	Serbians,Tuscans	8.65857e-06	5.53884e-05	0.156324
Romanians	Italians_Abruzzo,Montenegrins	9.27862e-06	4.20719e-05	0.220542
Serbians	North_Italians,Montenegrins	9.42645e-06	4.48663e-05	0.210101
Montenegrins	Kosovars,Croats	9.4346e-06	5.23636e-05	0.180175
Tuscans	Armenians,Croats	9.59877e-06	7.7919e-05	0.123189
Bulgarians	Tuscans,Romanians	9.94117e-06	5.68789e-05	0.174778
Ukranians	Russians,Belarusians	1.03418e-05	3.639e-05	0.284194
French	North_Italians,Bosnians	1.04405e-05	3.58081e-05	0.291568
Bosnians	Serbians,Hungarians	1.05227e-05	4.2409e-05	0.248125
Macedonians	Kosovars,Bosnians	1.07346e-05	5.34581e-05	0.200804
Serbians	Hungarians,Bulgarians	1.141e-05	3.97593e-05	0.286977
Serbians	Hungarians,Romanians	1.276e-05	3.98907e-05	0.319873
Macedonians	Serbians,Greeks	1.28434e-05	4.57355e-05	0.28082
Belarusians	Turks,Poles	1.29018e-05	5.72054e-05	0.225535
Poles	Belarusians,Croats	1.33394e-05	6.2861e-05	0.212204
Serbians	Turks,Bosnians	1.35358e-05	4.17292e-05	0.324372
Belarusians	Romanians,Poles	1.36902e-05	5.4162e-05	0.252764
Belarusians	Ukrainians,Poles	1.38821e-05	4.84844e-05	0.286322
Hungarians	Serbians,French	1.43869e-05	3.58665e-05	0.401123
Bulgarians	North_Italians,Armenians	1.44589e-05	5.51475e-05	0.262185
Kosovars	Ethiopians,Poles	1.48362e-05	9.84802e-05	0.150651
Macedonians	Bosnians,Bulgarians	1.51771e-05	4.81036e-05	0.315509
Greeks	Italians_Abruzzo,Bulgarians	1.55205e-05	3.50631e-05	0.442644
Romanians	Russians,Macedonians	1.555e-05	4.12186e-05	0.377257
Italians	Turks,Hungarians	1.60172e-05	3.53058e-05	0.45367
Montenegrins	Tuscans,Poles	1.63298e-05	7.17838e-05	0.227486
Macedonians	Serbians,Bulgarians	1.66754e-05	4.77458e-05	0.349254
French	Turks,Belarusians	1.72374e-05	4.00233e-05	0.430683
Montenegrins	Kosovars,Hungarians	1.79516e-05	5.29323e-05	0.339143
Belarusians	Tuscans,Poles	1.79651e-05	6.74993e-05	0.266152
Hungarians	Bosnians,French	1.82262e-05	3.72222e-05	0.48966
Hungarians	Russians,Croats	1.82814e-05	3.4997e-05	0.52237
Serbians	Romanians,Croats	1.85582e-05	3.7556e-05	0.494147
Hungarians	Tuscans,Croats	1.87736e-05	4.756e-05	0.394736
Croats	Macedonians,Hungarians	1.89604e-05	3.86015e-05	0.491183
Belarusians	Bosnians,Poles	1.89968e-05	5.16613e-05	0.367718
Macedonians	Bulgarians,Croats	1.91652e-05	4.72519e-05	0.405597
Bosnians	Hungarians,Croats	1.92348e-05	4.06019e-05	0.473742
Macedonians	Romanians,Poles	1.98924e-05	5.37621e-05	0.370008
Bulgarians	North_Italians,Ethiopians	2.01862e-05	7.22986e-05	0.279206
Macedonians	North_Italians,Serbians	2.04408e-05	4.96131e-05	0.412003
Poles	Belarusians,Montenegrins	2.06637e-05	7.06291e-05	0.292566
Ukranians	Russians,Turks	2.09825e-05	3.93066e-05	0.533816
Serbians	Bosnians,Romanians	2.11856e-05	3.99951e-05	0.529705
Greeks	Italians_Abruzzo,Romanians	2.1491e-05	3.47888e-05	0.617755
Tuscans	Turks,French	2.16364e-05	7.32578e-05	0.295346
Macedonians	Bulgarians,Montenegrins	2.19154e-05	5.03915e-05	0.434903
Romanians	North_Italians,Croats	2.21445e-05	4.3692e-05	0.506831
Belarusians	Italians_Abruzzo,Poles	2.26258e-05	5.52307e-05	0.40966
Belarusians	Russians,Macedonians	2.29017e-05	4.57929e-05	0.500115
Belarusians	Russians,Kosovars	2.29047e-05	5.24131e-05	0.437002
Bosnians	North_Italians,Croats	2.30539e-05	4.42752e-05	0.520695
Macedonians	Italians_Abruzzo,Montenegrins	2.32039e-05	4.68205e-05	0.495593
Greeks	Kosovars,French	2.35709e-05	4.33953e-05	0.543167
Macedonians	North_Italians,Croats	2.41076e-05	4.7587e-05	0.506601
Belarusians	Kosovars,Poles	2.48765e-05	6.24583e-05	0.398289
Tuscans	Macedonians,Ethiopians	2.50254e-05	9.60432e-05	0.260564
Bulgarians	Russians,Montenegrins	2.52133e-05	4.93833e-05	0.510564
Montenegrins	Ukrainians,Greeks	2.52362e-05	4.60173e-05	0.548407
North	Belarusians,Italians_Abruzzo	2.61149e-05	5.30827e-05	0.491966
Serbians	Ukrainians,Romanians	2.62072e-05	4.03102e-05	0.650138
Hungarians	Croats,Poles	2.65213e-05	4.42521e-05	0.599322
Macedonians	Ukrainians,Bulgarians	2.80509e-05	4.96476e-05	0.564999
Turks	North_Italians,Armenians	2.8225e-05	4.55278e-05	0.619951
Greeks	Turks,Tuscans	2.82973e-05	4.77429e-05	0.592701
Macedonians	Serbians,Romanians	2.83358e-05	4.78072e-05	0.592708
Croats	Bosnians,Montenegrins	2.92697e-05	3.8713e-05	0.75607
Bosnians	Ukrainians,Croats	2.94131e-05	4.07416e-05	0.721944
Romanians	Tuscans,Montenegrins	2.98763e-05	5.54996e-05	0.538315
Poles	Serbians,Belarusians	3.02917e-05	6.57789e-05	0.460508
Italians	Turks,Bulgarians	3.04338e-05	3.60495e-05	0.844223
Romanians	Serbians,Greeks	3.10144e-05	4.04132e-05	0.767432
Croats	Turks,Hungarians	3.13889e-05	3.82452e-05	0.820726
Romanians	Tuscans,Bulgarians	3.16399e-05	5.2844e-05	0.598741
Bosnians	Hungarians,Bulgarians	3.21693e-05	4.41165e-05	0.72919
Greeks	Tuscans,Bulgarians	3.36778e-05	4.99978e-05	0.673586
Croats	Hungarians,Romanians	3.42123e-05	3.62676e-05	0.94333
Greeks	Kosovars,Romanians	3.47002e-05	4.34017e-05	0.799513
Bosnians	French,Montenegrins	3.47989e-05	4.41375e-05	0.788421
Italians	Turks,Croats	3.52748e-05	3.29826e-05	1.0695
Poles	Macedonians,Belarusians	3.54243e-05	6.78094e-05	0.522409
Croats	Hungarians,Greeks	3.56634e-05	3.73873e-05	0.953891
Belarusians	Greeks,Poles	3.58384e-05	5.44449e-05	0.65825
Macedonians	Russians,Bulgarians	3.61967e-05	4.91202e-05	0.7369
Bosnians	Serbians,Romanians	3.62659e-05	4.33093e-05	0.837369
Belarusians	Russians,Tuscans	3.65555e-05	5.4138e-05	0.675228
Poles	Belarusians,Hungarians	3.69089e-05	6.57235e-05	0.561578
Macedonians	Kosovars,Romanians	3.69641e-05	5.47889e-05	0.674665
Tuscans	North_Italians,Armenians	3.71167e-05	8.13995e-05	0.455982
Bulgarians	Bosnians,French	3.74546e-05	4.59375e-05	0.815338
Bulgarians	North_Italians,Greeks	3.7509e-05	4.90054e-05	0.765406
Greeks	Macedonians,Italians_Abruzzo	3.7562e-05	3.52808e-05	1.06466
Greeks	Tuscans,Montenegrins	3.77192e-05	5.0716e-05	0.743733
Greeks	Kosovars,Hungarians	3.79869e-05	4.54928e-05	0.835007
Bulgarians	Russians,Romanians	3.80439e-05	4.96907e-05	0.765614
French	Tuscans,Hungarians	3.81203e-05	4.10037e-05	0.929678
Bulgarians	French,Croats	3.82315e-05	4.38932e-05	0.871013
Serbians	North_Italians,Hungarians	3.85761e-05	4.3811e-05	0.880513
Bosnians	Belarusians,Croats	3.89482e-05	4.39028e-05	0.887145
Croats	Bosnians,French	3.89841e-05	3.40658e-05	1.14437
Serbians	Macedonians,French	3.97437e-05	3.81412e-05	1.04202
Croats	Bosnians,Bulgarians	3.9761e-05	3.84654e-05	1.03368
Bulgarians	Bosnians,Montenegrins	4.00023e-05	5.09961e-05	0.784419
Croats	Serbians,Hungarians	4.00105e-05	3.60798e-05	1.10895
Bosnians	Russians,Croats	4.0303e-05	4.035e-05	0.998836
Macedonians	Turks,Montenegrins	4.06839e-05	4.98919e-05	0.81544
Romanians	North_Italians,Serbians	4.08005e-05	4.39056e-05	0.929279
Belarusians	French,Poles	4.16824e-05	4.96785e-05	0.839042
Tuscans	Kosovars,Ethiopians	4.17426e-05	0.000102855	0.40584
Macedonians	Tuscans,Hungarians	4.1787e-05	5.34992e-05	0.781077
Croats	Armenians,Hungarians	4.18313e-05	4.17509e-05	1.00193
Poles	Belarusians,French	4.20387e-05	6.38458e-05	0.658441
Romanians	North_Italians,Montenegrins	4.21801e-05	4.80081e-05	0.878604
Belarusians	Russians,Greeks	4.22092e-05	4.52884e-05	0.932009
Macedonians	French,Greeks	4.24797e-05	4.42809e-05	0.959323
Serbians	Ethiopians,Montenegrins	4.32649e-05	6.01828e-05	0.718893
Croats	Macedonians,Bosnians	4.37491e-05	3.90131e-05	1.12139
Bosnians	Turks,Serbians	4.39157e-05	4.56297e-05	0.962437
Greeks	Tuscans,Bosnians	4.44389e-05	5.06825e-05	0.876811
Turks	Macedonians,Armenians	4.53386e-05	4.26393e-05	1.0633
Hungarians	Ukrainians,Bosnians	4.5535e-05	3.84412e-05	1.18454
Serbians	Armenians,French	4.58318e-05	4.03494e-05	1.13587
Romanians	Macedonians,Greeks	4.65067e-05	4.03939e-05	1.15133
French	North_Italians,Croats	4.65399e-05	3.28912e-05	1.41497
Macedonians	Kosovars,Bulgarians	4.66836e-05	5.72965e-05	0.814773
Belarusians	Hungarians,Poles	4.68122e-05	4.94884e-05	0.945923
Serbians	Bosnians,Hungarians	4.69287e-05	3.86479e-05	1.21426
Belarusians	Russians,Serbians	4.75399e-05	4.35553e-05	1.09148
Poles	Belarusians,Greeks	4.78827e-05	6.88981e-05	0.694978
Macedonians	Bulgarians,Romanians	4.82095e-05	4.8687e-05	0.990192
Serbians	Russians,Romanians	4.82436e-05	4.04561e-05	1.19249
Belarusians	Macedonians,Poles	4.82968e-05	5.40078e-05	0.894256
Romanians	North_Italians,Macedonians	4.86955e-05	4.60014e-05	1.05857
Croats	Serbians,Bosnians	4.87227e-05	3.60702e-05	1.35077
Poles	Russians,Romanians	4.89896e-05	6.33456e-05	0.77337
Macedonians	Belarusians,Montenegrins	4.96201e-05	5.16014e-05	0.961603
Hungarians	Ethiopians,Croats	4.98807e-05	5.62645e-05	0.886539
Bulgarians	Croats,Montenegrins	5.04936e-05	4.80916e-05	1.04995
Bulgarians	Poles,Montenegrins	5.05959e-05	5.89984e-05	0.85758
French	Greeks,Poles	5.06167e-05	3.90067e-05	1.29764
Croats	Italians_Abruzzo,Hungarians	5.06465e-05	3.68752e-05	1.37346
Macedonians	Romanians,Croats	5.06587e-05	4.60453e-05	1.10019
Serbians	Bosnians,French	5.07681e-05	3.73587e-05	1.35894
Serbians	French,Poles	5.0994e-05	4.33268e-05	1.17696
Serbians	Tuscans,Montenegrins	5.11954e-05	5.12781e-05	0.998387
Croats	Bosnians,Romanians	5.13501e-05	3.68396e-05	1.39388
Kosovars	Ukrainians,Armenians	5.20011e-05	7.07181e-05	0.735329
North	Italians_Abruzzo,French	5.22539e-05	4.64178e-05	1.12573
Bulgarians	Serbians,Hungarians	5.23642e-05	4.58092e-05	1.14309
Croats	Hungarians,Bulgarians	5.26955e-05	3.83404e-05	1.37441
Macedonians	Hungarians,Bulgarians	5.29003e-05	4.63385e-05	1.14161
Romanians	North_Italians,Armenians	5.33618e-05	4.92436e-05	1.08363
Belarusians	Serbians,Poles	5.34294e-05	5.16329e-05	1.03479
Serbians	Italians_Abruzzo,Montenegrins	5.36399e-05	3.95555e-05	1.35607
Bosnians	Kosovars,Serbians	5.37188e-05	5.26598e-05	1.02011
Belarusians	Russians,Italians_Abruzzo	5.3817e-05	4.61928e-05	1.16505
Macedonians	Belarusians,Romanians	5.4499e-05	4.95147e-05	1.10066
Romanians	Russians,Montenegrins	5.50859e-05	4.40975e-05	1.24918
Bosnians	Macedonians,French	5.51654e-05	4.33092e-05	1.27376
Hungarians	Ukrainians,Croats	5.57133e-05	3.77156e-05	1,01,4772
Bulgarians	Armenians,Romanians	5.57312e-05	5.11822e-05	1.08888
French	Belarusians,Greeks	5.64607e-05	3.57665e-05	1.57859
Greeks	Serbians,Tuscans	5.7035e-05	4.5824e-05	1.24465
Macedonians	Bosnians,Romanians	5.82597e-05	4.77678e-05	1.21964
North	Ukrainians,Ethiopians	5.84286e-05	7.16251e-05	0.815755
Poles	Kosovars,Belarusians	5.88446e-05	7.38094e-05	0.797252
Belarusians	Russians,Bulgarians	5.9154e-05	4.60208e-05	1.28538
Serbians	French,Croats	6.05066e-05	3.39241e-05	1.78359
Poles	Belarusians,Italians_Abruzzo	6.10953e-05	6.96062e-05	0.877727
Hungarians	North_Italians,Bosnians	6.11855e-05	4.38462e-05	1.39546
Greeks	Macedonians,Tuscans	6.12198e-05	5.09665e-05	1.20118
Montenegrins	Belarusians,Tuscans	6.14221e-05	6.32873e-05	0.970528
Italians	Turks,Bosnians	6.16793e-05	3.59413e-05	1.71611
Romanians	Bulgarians,Poles	6.17675e-05	5.10824e-05	1.20918
French	Russians,Kosovars	6.20522e-05	3.97837e-05	1.55974
Greeks	Tuscans,Armenians	6.21527e-05	4.98389e-05	1.24707
Romanians	Macedonians,Italians_Abruzzo	6.25777e-05	3.9155e-05	1,01,5982
Serbians	Belarusians,French	6.27411e-05	3.97065e-05	1.58012
Belarusians	Poles,Montenegrins	6.30574e-05	5.53934e-05	1.13835
Kosovars	Belarusians,Ethiopians	6.37682e-05	8.63713e-05	0.738304
Macedonians	French,Bulgarians	6.42559e-05	4.56247e-05	1.40836
Macedonians	Poles,Montenegrins	6.43807e-05	5.65464e-05	1.13855
Belarusians	Russians,Hungarians	6.43982e-05	4.25902e-05	1.51204
Poles	Belarusians,Bosnians	6.47243e-05	6.66971e-05	0.970421
Hungarians	North_Italians,Croats	6.50046e-05	4.11026e-05	1.58152
Bulgarians	Serbians,Croats	6.50491e-05	4.54052e-05	1.43263
Poles	Belarusians,Tuscans	6.5756e-05	7.77787e-05	0.845424
Macedonians	Hungarians,Romanians	6.59106e-05	4.5237e-05	1.45701
Bosnians	Macedonians,Serbians	6.61898e-05	4.58382e-05	1.44399
Romanians	North_Italians,Hungarians	6.66167e-05	4.54836e-05	1.46463
North	Ukrainians,Armenians	6.66614e-05	5.66458e-05	1.17681
Greeks	Kosovars,Bulgarians	6.76401e-05	4.65113e-05	1.45427
Bosnians	Serbians,Bulgarians	6.76881e-05	4.62883e-05	1.46231
Serbians	Turks,Montenegrins	6.78315e-05	4.35765e-05	1.55661
Romanians	Bulgarians,Montenegrins	6.79164e-05	4.4323e-05	1,01,5323
Romanians	Belarusians,Bulgarians	6.79493e-05	4.45673e-05	1.52464
Croats	Serbians,French	6.84516e-05	3.44199e-05	1.98872
North	Italians_Abruzzo,Poles	6.84807e-05	5.80578e-05	1.17953
Italians	Turks,Poles	6.89519e-05	4.44468e-05	1.55133
Ukranians	Belarusians,Poles	6.91258e-05	4.50414e-05	1.53472
Serbians	French,Greeks	6.938e-05	3.70458e-05	1.87282
Poles	Ukrainians,Belarusians	6.98389e-05	6.34601e-05	1.10052
Macedonians	North_Italians,Montenegrins	6.99876e-05	5.28673e-05	1.32383
Poles	Belarusians,Romanians	7.00309e-05	6.76406e-05	1.03534
Belarusians	Croats,Poles	7.03817e-05	5.15044e-05	1.36652
Tuscans	Ethiopians,Bulgarians	7.04139e-05	9.15286e-05	0.769311
Serbians	Greeks,Montenegrins	7.05111e-05	4.06807e-05	1.73328
Italians	Turks,Greeks	7.06518e-05	3.1349e-05	2.25372
Poles	Turks,Belarusians	7.08193e-05	7.10068e-05	0.997359
Croats	Bosnians,Italians_Abruzzo	7.0847e-05	3.72269e-05	1.90311
French	Tuscans,Croats	7.0948e-05	4.09646e-05	1.73193
Croats	Tuscans,Bosnians	7.11631e-05	4.90565e-05	1.45063
Romanians	Ukrainians,Bulgarians	7.13496e-05	4.21481e-05	1.69283
Greeks	Tuscans,Croats	7.23805e-05	4.86859e-05	1.48668
Belarusians	Ukrainians,Russians	7.26661e-05	4.16308e-05	1.74549
Macedonians	Ukrainians,Montenegrins	7.2777e-05	4.78415e-05	1.52121
Tuscans	Belarusians,Italians_Abruzzo	7.29062e-05	7.70677e-05	0.946001
Bosnians	Tuscans,Hungarians	7.29872e-05	5.22626e-05	1.39655
Macedonians	Tuscans,Bulgarians	7.34444e-05	5.79829e-05	1.26666
North	Turks,French	7.39764e-05	4.98077e-05	1.48524
Bulgarians	Serbians,Bosnians	7.40108e-05	4.81839e-05	1.53601
Armenians	Tuscans,Ethiopians	7.4265e-05	7.77419e-05	0.955276
Hungarians	French,Montenegrins	7.45297e-05	3.79796e-05	1.96236
French	Italians_Abruzzo,Hungarians	7.51669e-05	3.0949e-05	2.42873
Poles	Belarusians,Bulgarians	7.62127e-05	6.99024e-05	1.09027
Macedonians	Romanians,Montenegrins	7.6503e-05	4.89946e-05	1.56146
Greeks	Kosovars,Croats	7.66029e-05	4.41287e-05	1.73589
Bulgarians	Ukrainians,Serbians	7.7061e-05	4.83466e-05	1.59393
Croats	French,Montenegrins	7.71142e-05	3.6415e-05	2.11765
Montenegrins	Armenians,Croats	7.72893e-05	4.97194e-05	1.55451
Tuscans	Italians_Abruzzo,Poles	7.75669e-05	7.98419e-05	0.971506
Romanians	Italians_Abruzzo,French	7.78317e-05	3.77321e-05	2.06274
Bulgarians	Kosovars,Armenians	7.78417e-05	5.86596e-05	1.32701
Belarusians	Russians,Bosnians	7.83729e-05	4.3975e-05	1.78221
Italians	Turks,Belarusians	7.86758e-05	3.89756e-05	2.01859
Croats	North_Italians,Hungarians	7.86846e-05	4.09338e-05	1.92224
Tuscans	Serbians,Armenians	7.87918e-05	7.85e-05	1.00372
Serbians	French,Ethiopians	7.88938e-05	5.49456e-05	1.43585
Macedonians	Italians_Abruzzo,Bulgarians	7.8945e-05	4.68696e-05	1.68436
Hungarians	Macedonians,French	7.89455e-05	3.78763e-05	2.0843
Macedonians	Ukrainians,Romanians	7.92052e-05	4.72576e-05	1.67603
Romanians	Bosnians,Bulgarians	7.94215e-05	4.21343e-05	1.88496
Belarusians	Russians,Croats	7.97278e-05	4.26095e-05	1.87113
Serbians	Bosnians,Croats	8.02356e-05	3.69295e-05	2.17267
Greeks	Tuscans,Poles	8.09393e-05	6.13631e-05	1.31902
Serbians	Armenians,Montenegrins	8.13107e-05	4.50687e-05	1.80415
Bosnians	Armenians,French	8.1606e-05	4.5776e-05	1.78272
Bulgarians	Ukrainians,French	8.19855e-05	4.68996e-05	1.74811
Bosnians	French,Romanians	8.24499e-05	4.07983e-05	2.02091
Montenegrins	Kosovars,Serbians	8.26959e-05	5.41122e-05	1.52823
Hungarians	Tuscans,Bosnians	8.3233e-05	5.18593e-05	1.60498
Macedonians	North_Italians,Hungarians	8.38318e-05	4.94182e-05	1.69637
Kosovars	Russians,Armenians	8.42014e-05	7.05808e-05	1.19298
Montenegrins	Ethiopians,Croats	8.46653e-05	6.31237e-05	1.34126
Macedonians	Armenians,Bulgarians	8.50171e-05	5.22276e-05	1.62782
Greeks	North_Italians,Montenegrins	8.51163e-05	4.24747e-05	2.00393
Romanians	Macedonians,French	8.51694e-05	3.93989e-05	2.16172
Macedonians	French,Romanians	8.55441e-05	4.44451e-05	1.92471
Greeks	Ethiopians,Romanians	8.57613e-05	5.62344e-05	1.52507
Romanians	Kosovars,Bosnians	8.62243e-05	5.08001e-05	1.69733
Tuscans	Russians,Ethiopians	8.63016e-05	9.18888e-05	0.939196
Bosnians	Serbians,Armenians	8.65422e-05	4.7518e-05	1.82125
Bosnians	Turks,French	8.69919e-05	4.31731e-05	2.01496
Serbians	French,Bulgarians	8.73242e-05	3.91218e-05	2.23211
Romanians	Ukrainians,Montenegrins	8.77823e-05	4.49984e-05	1.95079
Croats	Ukrainians,Hungarians	8.79758e-05	3.43624e-05	2.56023
North	Russians,Italians_Abruzzo	8.81512e-05	5.12043e-05	1.72156
Serbians	Hungarians,Croats	8.89477e-05	3.59733e-05	1,02,4726
Belarusians	Russians,Montenegrins	8.93204e-05	4.73111e-05	1.88794
Romanians	Belarusians,Montenegrins	8.93316e-05	4.84595e-05	1.84343
Macedonians	French,Montenegrins	8.94418e-05	4.55888e-05	1.96192
Macedonians	Serbians,French	9.00947e-05	4.41997e-05	2.03835
Armenians	Ethiopians,Romanians	9.01293e-05	6.33086e-05	1.42365
Tuscans	Russians,Italians_Abruzzo	9.01677e-05	7.61798e-05	1.18362
Hungarians	French,Bulgarians	9.03011e-05	3.71347e-05	2.43172
Bosnians	Croats,Poles	9.03331e-05	4.88964e-05	1.84744
Hungarians	Bulgarians,Croats	9.09937e-05	3.87665e-05	2.34723
Romanians	Bulgarians,Croats	9.10105e-05	4.19411e-05	2.16996
Romanians	Ukrainians,Macedonians	9.15083e-05	4.27056e-05	2.14277
Serbians	Ukrainians,French	9.22486e-05	3.71101e-05	2.48581
Montenegrins	Ukrainians,Turks	9.30096e-05	4.94797e-05	1.87975
Hungarians	Italians_Abruzzo,Croats	9.30426e-05	3.95673e-05	1,02,3515
Greeks	Russians,Tuscans	9.3159e-05	5.02416e-05	1.85422
Romanians	Italians_Abruzzo,Bulgarians	9.33132e-05	4.14914e-05	2.24898
Romanians	Greeks,Montenegrins	9.34786e-05	4.41596e-05	2.11684
Serbians	Bosnians,Poles	9.36108e-05	4.85369e-05	1.92865
Croats	Hungarians,Ethiopians	9.38084e-05	5.78162e-05	1.62253
Serbians	Turks,French	9.38442e-05	3.8523e-05	2.43606
Macedonians	Hungarians,Montenegrins	9.38576e-05	4.69156e-05	2.00056
Montenegrins	Ukrainians,Tuscans	9.41112e-05	5.97268e-05	1,01,5757
Macedonians	North_Italians,Bulgarians	9.41481e-05	5.24324e-05	1.79561
Romanians	Macedonians,Montenegrins	9.42105e-05	4.50087e-05	2.09316
Romanians	North_Italians,Bulgarians	9.46341e-05	4.55806e-05	2.07619
Greeks	Russians,Kosovars	9.47602e-05	4.87917e-05	1.94214
Bosnians	Macedonians,Montenegrins	9.49582e-05	4.92457e-05	1.92825
Bosnians	North_Italians,Hungarians	9.50347e-05	4.81234e-05	1.97481
North	Ukrainians,Italians_Abruzzo	9.51269e-05	5.04137e-05	1.88693
Greeks	Italians_Abruzzo,French	9.58804e-05	3.32305e-05	2.88531
Serbians	French,Romanians	9.69521e-05	3.74339e-05	2.58995
Croats	Turks,Bosnians	9.72515e-05	4.03133e-05	2.41239
Romanians	French,Montenegrins	9.81082e-05	4.10232e-05	2.39153
Hungarians	French,Romanians	9.8579e-05	3.73785e-05	2.63732
Bulgarians	Serbians,Montenegrins	9.86546e-05	4.76998e-05	2.06824
Greeks	Belarusians,Tuscans	9.88127e-05	5.44293e-05	1.81543
Bosnians	Serbians,Greeks	9.90064e-05	4.41618e-05	1,02,2419
Croats	Bosnians,Greeks	9.91047e-05	3.83472e-05	2.58441
Romanians	Greeks,Bulgarians	9.92837e-05	4.10442e-05	2.41895
Macedonians	Tuscans,Montenegrins	9.99743e-05	5.91824e-05	1.68926
Macedonians	Italians_Abruzzo,French	0.000100798	4.26614e-05	2.36275
Macedonians	Greeks,Bulgarians	0.000100986	4.77603e-05	2.11445
Romanians	French,Bulgarians	0.000101216	4.0532e-05	2.49718
Greeks	Tuscans,Romanians	0.000101322	4.74542e-05	2.13514
Serbians	Macedonians,Romanians	0.000101503	4.09575e-05	2.47825
Bulgarians	Kosovars,Greeks	0.000101634	5.53669e-05	1.83565
Bosnians	Bulgarians,Montenegrins	0.000101697	5.0391e-05	2.01815
Hungarians	Armenians,Croats	0.000101858	4.41467e-05	2.30726
Poles	Belarusians,Armenians	0.000101925	7.34669e-05	1.38736
Montenegrins	Russians,North_Italians	0.000102472	5.25373e-05	1.95046
Greeks	Kosovars,Poles	0.000103103	5.61352e-05	1.83669
Tuscans	Italians_Abruzzo,French	0.000103127	7.19248e-05	1.43381
French	Tuscans,Bosnians	0.000103127	4.49576e-05	2.29388
Bosnians	North_Italians,Serbians	0.000103387	4.76058e-05	2.17174
Poles	North_Italians,Belarusians	0.000103461	7.03436e-05	1,01,4708
Romanians	Kosovars,Serbians	0.000103677	4.66014e-05	2.22476
Hungarians	Serbians,Croats	0.000103679	3.70092e-05	2.80142
Tuscans	Armenians,Bosnians	0.000103852	7.8115e-05	1.32948
Bosnians	French,Bulgarians	0.000104244	4.39872e-05	2.36988
French	Ukrainians,Greeks	0.000104301	3.24348e-05	3.21572
Bulgarians	Turks,Romanians	0.000104669	4.9573e-05	2.11141
Romanians	Macedonians,Hungarians	0.000104803	4.18261e-05	2.50568
Turks	Armenians,Greeks	0.00010567	3.99469e-05	2.64525
Romanians	Kosovars,Tuscans	0.00010585	5.98735e-05	1.76789
Greeks	Ukrainians,Tuscans	0.000106594	5.10576e-05	2.08772
French	North_Italians,Serbians	0.000107144	3.54997e-05	3.01817
Greeks	Kosovars,Serbians	0.000107363	4.57465e-05	2.34691
North	Russians,Armenians	0.000107415	5.63992e-05	1.90456
North	French,Greeks	0.000107718	4.68663e-05	2.29841
Poles	Belarusians,Ethiopians	0.000107777	8.72036e-05	1.23592
Belarusians	Russians,French	0.000107807	4.20276e-05	2.56515
Hungarians	Greeks,Croats	0.000108026	3.85049e-05	1,02,8055
Macedonians	Italians_Abruzzo,Romanians	0.000108136	4.50215e-05	2.40187
Italians	Ukrainians,Turks	0.000108849	3.61074e-05	3.0146
Tuscans	Armenians,Montenegrins	0.000108907	8.01558e-05	1.35869
Montenegrins	Kosovars,French	0.000109057	5.30497e-05	2.05575
Bulgarians	Kosovars,Montenegrins	0.000109324	5.89493e-05	1.85455
Serbians	North_Italians,Macedonians	0.000109398	4.57346e-05	2.39201
Hungarians	Romanians,Croats	0.000109477	3.91023e-05	2.79976
Romanians	Hungarians,Bulgarians	0.000109494	4.17223e-05	2.62435
Bulgarians	Bosnians,Hungarians	0.000109529	4.92076e-05	2.22587
Macedonians	Bosnians,Montenegrins	0.000109808	4.88555e-05	2.24762
Bulgarians	Belarusians,French	0.000109868	4.82375e-05	2.27765
Croats	Serbians,Romanians	0.0001104	3.78172e-05	2.91931
Bosnians	Ukrainians,Hungarians	0.000110685	4.11374e-05	2.69062
Romanians	Serbians,Bulgarians	0.000110844	4.17934e-05	2.65218
Bosnians	Serbians,Tuscans	0.000111602	5.32853e-05	2.09443
Croats	Macedonians,French	0.00011196	3.70853e-05	3.01899
Hungarians	Turks,Croats	0.0001123	3.98421e-05	2.81864
Romanians	Macedonians,Bosnians	0.000112454	4.33085e-05	2.59657
Serbians	Macedonians,Bulgarians	0.000113163	4.30979e-05	2.62572
Bosnians	Romanians,Montenegrins	0.000113202	4.66498e-05	2.42662
Greeks	Kosovars,Belarusians	0.000114065	5.11249e-05	1,02,2311
Tuscans	Ukrainians,Italians_Abruzzo	0.000114804	7.57106e-05	1.51635
Poles	Russians,Armenians	0.000114812	7.07093e-05	1.62372
Romanians	Turks,Tuscans	0.000115562	5.04232e-05	2.29184
Macedonians	Russians,Montenegrins	0.000116039	4.83698e-05	2.39899
Romanians	Macedonians,Belarusians	0.000116214	4.69548e-05	2.47503
Serbians	Macedonians,Greeks	0.000116995	4.06709e-05	2.87662
Croats	Hungarians,Poles	0.000117168	4.48436e-05	2.61281
Montenegrins	North_Italians,Poles	0.000117214	6.26825e-05	1.86996
Greeks	Ukrainians,Kosovars	0.000117302	4.58975e-05	2.55574
Bosnians	French,Greeks	0.000117618	4.21529e-05	2.79028
Belarusians	Ukrainians,Hungarians	0.000118432	4.28896e-05	2.76132
Macedonians	Ethiopians,Bulgarians	0.000118833	6.87389e-05	1.72876
Romanians	Macedonians,Croats	0.000120055	4.17601e-05	2.87487
Serbians	Macedonians,Tuscans	0.00012118	5.13991e-05	2.35763
Greeks	Kosovars,Macedonians	0.000121943	4.65416e-05	2.62008
Macedonians	North_Italians,Romanians	0.000122018	4.95126e-05	2.46438
Romanians	Hungarians,Montenegrins	0.000122158	4.30432e-05	2.83802
Romanians	Macedonians,Bulgarians	0.000122504	4.33602e-05	2.82527
Bulgarians	Russians,Serbians	0.000122837	4.97554e-05	2.46882
Serbians	Russians,French	0.000123008	3.74817e-05	3.28182
Macedonians	Greeks,Montenegrins	0.000123475	4.81912e-05	2.56219
Belarusians	Russians,Romanians	0.000123566	4.64215e-05	2.66183
Turks	Kosovars,Armenians	0.000123787	4.94831e-05	1,02,5016
Hungarians	Bosnians,Bulgarians	0.000124051	4.02621e-05	3.08109
Macedonians	Greeks,Romanians	0.000124207	4.70532e-05	2.63971
Macedonians	Croats,Montenegrins	0.000124288	4.61553e-05	2.69282
Hungarians	Macedonians,Croats	0.000124729	3.94484e-05	3.16182
Russians	Belarusians,Ethiopians	0.000124767	5.87674e-05	2.12306
Croats	Tuscans,Hungarians	0.000124916	4.62147e-05	2.70294
Croats	Russians,Hungarians	0.000125408	3.5887e-05	3.49452
Bosnians	Serbians,Montenegrins	0.00012634	4.64927e-05	2.71742
Serbians	Belarusians,Bosnians	0.000128043	4.36749e-05	2.93174
Kosovars	Armenians,Montenegrins	0.000128405	7.14587e-05	1.79692
Bosnians	Serbians,Italians_Abruzzo	0.000128434	4.34244e-05	2.95764
Croats	North_Italians,Serbians	0.000129056	4.09418e-05	3.15218
Greeks	Russians,Turks	0.000129108	4.26545e-05	3.02683
North	Kosovars,French	0.000129613	5.41286e-05	2.39453
Macedonians	Kosovars,Italians_Abruzzo	0.00012986	5.40296e-05	1,02,4035
French	Kosovars,Poles	0.000130149	4.90668e-05	2.65248
Croats	Serbians,Bulgarians	0.000130233	3.98642e-05	3.26692
Montenegrins	Armenians,Hungarians	0.00013059	5.08814e-05	2.56656
Bosnians	Serbians,Ethiopians	0.000131231	6.1868e-05	2.12115
Serbians	Kosovars,Macedonians	0.000131575	5.0548e-05	2.60297
Greeks	North_Italians,Bulgarians	0.000131765	4.30957e-05	3.05751
Romanians	Kosovars,Bulgarians	0.000132223	4.88494e-05	2.70676
Croats	Macedonians,Serbians	0.000132723	3.77433e-05	3.51646
Serbians	Bulgarians,Romanians	0.000133037	4.24071e-05	3.13713
Macedonians	Serbians,Croats	0.000133603	4.58102e-05	2.91645
Romanians	Kosovars,Macedonians	0.000133749	5.03258e-05	2.65767
Bulgarians	Serbians,Belarusians	0.000134451	4.97083e-05	1,02,7048
Macedonians	Turks,Bulgarians	0.000135506	4.85153e-05	2.79305
Bulgarians	Tuscans,Greeks	0.000135596	5.71379e-05	2.37314
Macedonians	Kosovars,Tuscans	0.000136409	6.63308e-05	2.05649
Greeks	North_Italians,Romanians	0.000136415	4.05268e-05	3.36604
Hungarians	Bosnians,Croats	0.000136985	3.87056e-05	3.53916
Bulgarians	Tuscans,French	0.00013743	5.4001e-05	2.54495
Greeks	Turks,Romanians	0.000137674	3.85791e-05	3.56863
Bosnians	Hungarians,French	0.000137994	3.99113e-05	3.45752
Macedonians	Serbians,Bosnians	0.000138577	4.69239e-05	2.95322
Greeks	North_Italians,Macedonians	0.000138604	4.20044e-05	3.29975
Romanians	Poles,Montenegrins	0.000138699	5.16504e-05	2.68534
Turks	Tuscans,Armenians	0.000139525	4.95201e-05	2.81754
Tuscans	Italians_Abruzzo,Hungarians	0.000140173	7.25058e-05	1.93327
Serbians	Kosovars,Romanians	0.000140203	4.80908e-05	2.91538
Croats	Belarusians,Hungarians	0.000140737	3.80637e-05	3.69742
Ukranians	Russians,Poles	0.000141067	4.12685e-05	3.41827
Poles	Ukrainians,Hungarians	0.000141459	6.39446e-05	2.21221
Greeks	North_Italians,Bosnians	0.00014182	4.17792e-05	3.39451
Montenegrins	Greeks,Croats	0.000141936	4.55842e-05	3.11372
Croats	Macedonians,Montenegrins	0.000142038	4.21977e-05	3.36602
Romanians	Macedonians,Serbians	0.000142378	4.11424e-05	3.46061
Bulgarians	Hungarians,Croats	0.000142587	4.63853e-05	3.07396
Bulgarians	Hungarians,French	0.000143279	4.4465e-05	1,03,2223
Bulgarians	French,Poles	0.000144042	5.55047e-05	2.59513
Belarusians	Russians,Poles	0.000144607	4.7951e-05	3.01573
Croats	Bulgarians,Montenegrins	0.000144789	4.17639e-05	3.46683
French	Ukrainians,Turks	0.000144931	3.56696e-05	4.06315
Macedonians	North_Italians,Kosovars	0.00014509	5.7923e-05	2.50488
Hungarians	Serbians,Bosnians	0.000145698	3.80115e-05	3.83299
Romanians	Bosnians,Montenegrins	0.000145759	4.53365e-05	3.21505
Greeks	North_Italians,Serbians	0.000146201	3.9478e-05	3.70336
Bosnians	Macedonians,Romanians	0.000146507	4.68369e-05	3.12802
Hungarians	Kosovars,Croats	0.000146642	4.60161e-05	3.18675
Croats	French,Romanians	0.000146845	3.62791e-05	4.04766
Romanians	Serbians,French	0.000146928	3.9149e-05	3.75306
French	Kosovars,Belarusians	0.000146955	4.41055e-05	3.33189
Tuscans	North_Italians,Turks	0.000148417	7.7382e-05	1.91798
Macedonians	Bosnians,French	0.000149601	4.49671e-05	1,03,3269
Romanians	Macedonians,Poles	0.000150821	4.97551e-05	3.03127
Serbians	Ukrainians,Bosnians	0.000151209	4.08746e-05	3.69933
Greeks	North_Italians,Italians_Abruzzo	0.000151344	3.78839e-05	3.99494
Croats	Bosnians,Ethiopians	0.000151397	5.97651e-05	2.53321
Hungarians	Turks,French	0.000151846	3.98969e-05	3.80596
Greeks	Kosovars,Bosnians	0.000152651	4.51067e-05	3.38421
Macedonians	Kosovars,Ethiopians	0.000153126	7.9381e-05	1.929
Bulgarians	Italians_Abruzzo,Greeks	0.000153754	4.59754e-05	3.34426
Hungarians	North_Italians,Serbians	0.00015405	4.33086e-05	3.55703
Hungarians	Bosnians,Romanians	0.000154123	4.02772e-05	3.82656
Greeks	Tuscans,Ethiopians	0.000154133	7.22713e-05	2.13271
Romanians	Kosovars,Armenians	0.000154334	5.00196e-05	3.08547
Macedonians	French,Croats	0.000154366	4.39345e-05	3.51355
Macedonians	Ukrainians,Serbians	0.000154501	4.86325e-05	3.1769
Macedonians	Serbians,Hungarians	0.000154653	4.50192e-05	3.43527
North	Ethiopians,Croats	0.000155046	6.98686e-05	2.21911
Turks	Italians_Abruzzo,Ethiopians	0.000155135	5.57663e-05	2.78187
Hungarians	Croats,Montenegrins	0.000155159	4.04817e-05	3.83281
Macedonians	Russians,Romanians	0.000155163	4.7567e-05	3.262
Montenegrins	Kosovars,Bosnians	0.000155317	5.63317e-05	2.75719
Romanians	Kosovars,Italians_Abruzzo	0.000155473	4.59836e-05	3.38106
Bulgarians	Bosnians,Croats	0.000155521	4.92706e-05	3.15647
Romanians	North_Italians,Kosovars	0.000156821	5.30468e-05	2.95628
Italians	Tuscans,Greeks	0.000156956	4.26658e-05	3.67873
Croats	French,Bulgarians	0.000157051	3.66354e-05	4.28686
Hungarians	Bosnians,Italians_Abruzzo	0.000157186	4.00305e-05	3.92665
French	North_Italians,Montenegrins	0.000157344	3.95574e-05	3.97761
Belarusians	Russians,Armenians	0.000157495	5.14542e-05	3.06087
Greeks	Tuscans,Italians_Abruzzo	0.000157552	4.25119e-05	3.70606
Belarusians	Ukrainians,Serbians	0.000157563	4.4859e-05	3.51241
Montenegrins	Italians_Abruzzo,Croats	0.000157638	4.50545e-05	3.49883
Croats	Hungarians,French	0.000157743	3.39097e-05	4.65187
Bulgarians	Russians,French	0.000158521	4.74767e-05	3.33892
Serbians	Russians,Bosnians	0.000158876	4.07375e-05	3.90001
Bosnians	Russians,Hungarians	0.000159007	4.20197e-05	1,03,7841
Bosnians	French,Ethiopians	0.000159357	5.83744e-05	2.72991
North	Italians_Abruzzo,Hungarians	0.00015994	5.05847e-05	3.16182
North	Armenians,Hungarians	0.000160794	5.47077e-05	2.93914
Serbians	Kosovars,Bulgarians	0.000161583	5.06064e-05	3.19294
Greeks	Tuscans,Hungarians	0.000161633	4.88946e-05	3.30574
Hungarians	Macedonians,Bosnians	0.000161774	4.14502e-05	3.90285
Italians	North_Italians,Greeks	0.000163163	3.76787e-05	4.33039
Macedonians	Kosovars,Turks	0.000163807	5.51955e-05	2.96777
Croats	Turks,Serbians	0.000163951	3.96869e-05	4.13112
Macedonians	Tuscans,Romanians	0.000164309	5.58262e-05	2.94321
Tuscans	French,Greeks	0.000164798	7.45784e-05	2.20973
Croats	Armenians,Bosnians	0.000165416	4.31981e-05	3.82925
Hungarians	Kosovars,French	0.000165635	4.41283e-05	3.75349
French	Hungarians,Ethiopians	0.000167186	5.0491e-05	3.31119
Romanians	Croats,Montenegrins	0.000167839	4.22017e-05	3.97707
Croats	Romanians,Montenegrins	0.000167883	4.19808e-05	3.99904
Macedonians	Serbians,Montenegrins	0.000169959	4.8557e-05	3.50019
North	Hungarians,Ethiopians	0.00017017	7.30714e-05	2.32882
Poles	Ukrainians,Croats	0.000170651	6.14746e-05	2.77595
Belarusians	Ukrainians,Croats	0.000171193	4.345e-05	3.94001
Serbians	Kosovars,Montenegrins	0.000172253	5.12689e-05	3.35979
Kosovars	Ukrainians,Ethiopians	0.000172441	8.73986e-05	1.97304
Bosnians	Kosovars,Romanians	0.000172736	5.28467e-05	3.26863
Bosnians	Belarusians,Hungarians	0.000172982	4.383e-05	3.94666
Bulgarians	North_Italians,Italians_Abruzzo	0.000173333	4.95185e-05	3.50036
Montenegrins	Serbians,Armenians	0.000173638	5.04681e-05	3.44055
Poles	Ukrainians,Serbians	0.000173973	6.53783e-05	2.66102
Italians	Tuscans,Bulgarians	0.000175113	4.53698e-05	3.85969
Croats	Kosovars,Bosnians	0.000175153	4.65117e-05	3.76577
Romanians	Bosnians,French	0.000176511	4.15156e-05	4.25167
Montenegrins	Tuscans,Croats	0.000176598	5.56202e-05	3.17507
Croats	Kosovars,French	0.000176737	4.39294e-05	4.02319
French	North_Italians,Macedonians	0.000176798	3.7381e-05	4.72963
Hungarians	Bosnians,Montenegrins	0.000177725	4.09952e-05	4.33526
Serbians	Tuscans,Bulgarians	0.000177949	5.09638e-05	3.49168
Serbians	Hungarians,French	0.000178239	3.60115e-05	4.94951
Croats	Serbians,Montenegrins	0.000178394	3.78713e-05	4.71054
French	Armenians,Hungarians	0.00017894	3.59093e-05	4.98312
Bosnians	Bulgarians,Romanians	0.000179539	4.7452e-05	1,03,7836
Hungarians	Serbians,Romanians	0.000179866	3.9362e-05	4.56954
Hungarians	French,Greeks	0.000180051	3.73447e-05	4.82133
Bulgarians	Serbians,Poles	0.000180372	5.57839e-05	3.23341
Italians	Macedonians,Tuscans	0.000180614	4.5348e-05	3.98284
Bosnians	Turks,Montenegrins	0.000180636	4.96519e-05	3.63805
Belarusians	Ukrainians,Bosnians	0.000180728	4.5396e-05	3.98115
Hungarians	Serbians,Bulgarians	0.000181216	3.9983e-05	4.53233
Bosnians	North_Italians,Montenegrins	0.000181703	5.20129e-05	3.49342
French	Italians_Abruzzo,Croats	0.000182264	3.07175e-05	5.93354
Macedonians	Serbians,Belarusians	0.000183784	4.95076e-05	3.71224
Hungarians	Serbians,Tuscans	0.000184313	4.90073e-05	3.76093
Montenegrins	Serbians,Greeks	0.000184437	4.65552e-05	3.96169
Kosovars	Armenians,Bosnians	0.000186524	7.03416e-05	2.65169
Italians	Turks,Romanians	0.000186835	3.52133e-05	5.30582
Belarusians	Ukrainians,Macedonians	0.000186847	4.72656e-05	3.95313
Serbians	North_Italians,Bulgarians	0.00018687	4.57896e-05	4.08106
Belarusians	Ukrainians,French	0.000187071	4.30454e-05	4.34589
Montenegrins	Turks,Serbians	0.000187117	4.98258e-05	3.75543
Italians	Kosovars,Tuscans	0.000187163	5.21186e-05	3.59109
Croats	North_Italians,Montenegrins	0.000187918	4.48402e-05	4.19085
North	Italians_Abruzzo,Croats	0.000187978	4.96051e-05	3.78948
Romanians	Turks,Greeks	0.000188586	4.16155e-05	4.53163
Bulgarians	Turks,Tuscans	0.000188591	5.92031e-05	3.1855
Romanians	French,Croats	0.000188877	3.82354e-05	4.93983
Macedonians	Serbians,Poles	0.000188917	5.48247e-05	3.44584
Montenegrins	Hungarians,Greeks	0.000189069	4.62071e-05	4.09178
Bosnians	Macedonians,Bulgarians	0.000189589	4.8553e-05	3.90479
Serbians	Belarusians,Croats	0.000189776	4.03054e-05	4.70844
Romanians	North_Italians,Greeks	0.000189846	4.43672e-05	4.27897
Montenegrins	Hungarians,Ethiopians	0.000189943	6.70704e-05	2.832
Bulgarians	Turks,Greeks	0.000193972	4.83801e-05	4.00933
Bosnians	Kosovars,Macedonians	0.000194032	5.56604e-05	3.48599
Hungarians	Bosnians,Ethiopians	0.000194574	6.2627e-05	3.10688
Romanians	Russians,Serbians	0.000195637	4.17561e-05	4.68523
Kosovars	Armenians,Croats	0.00019626	6.95743e-05	2.82087
Serbians	Turks,Macedonians	0.000197107	4.28531e-05	4.59958
Croats	Turks,French	0.000197289	3.80847e-05	5.18027
North	Armenians,Croats	0.000197647	5.36776e-05	3.68211
French	Ukrainians,Kosovars	0.000198032	3.94341e-05	5.02186
Turks	Armenians,Italians_Abruzzo	0.000198351	3.8449e-05	5.15881
Montenegrins	Bosnians,Italians_Abruzzo	0.000199215	4.74241e-05	4.20072
Montenegrins	North_Italians,Belarusians	0.000200011	5.66462e-05	3.53089
Macedonians	French,Poles	0.000200167	5.23645e-05	3.82258
Serbians	Macedonians,Italians_Abruzzo	0.000200395	4.18227e-05	4.79153
Hungarians	Bosnians,Greeks	0.000200427	3.95041e-05	5.07357
North	Tuscans,French	0.000200757	5.65091e-05	3.55265
Bosnians	Hungarians,Poles	0.000200797	4.84293e-05	4.14619
Serbians	Greeks,Bulgarians	0.000201306	4.19219e-05	4.80193
Montenegrins	Serbians,Italians_Abruzzo	0.000201309	4.68579e-05	4.29615
Greeks	Bulgarians,Montenegrins	0.000201415	4.19702e-05	4.79899
Montenegrins	Turks,Croats	0.00020156	4.6758e-05	4.31071
Hungarians	Turks,Bosnians	0.000202848	4.33701e-05	4.67714
French	Hungarians,Greeks	0.000203072	3.19515e-05	6.35562
Serbians	North_Italians,Romanians	0.00020308	4.4956e-05	1,04,5173
Serbians	Ukrainians,Croats	0.000203406	3.75816e-05	5.41238
Montenegrins	Serbians,Tuscans	0.000203753	5.89731e-05	3.45502
Hungarians	Armenians,French	0.000204182	4.24924e-05	4.80515
North	Belarusians,Tuscans	0.000204838	6.4285e-05	3.18641
Tuscans	Turks,Poles	0.000205121	8.45739e-05	2.42535
Croats	Serbians,Tuscans	0.00020555	4.73573e-05	4.34041
Montenegrins	Ukrainians,North_Italians	0.000205586	5.23373e-05	1,03,9281
French	North_Italians,Bulgarians	0.000206691	3.77695e-05	5.47242
Serbians	Croats,Poles	0.000206728	4.5043e-05	4.58957
Macedonians	Belarusians,French	0.000206782	4.724e-05	4.37726
Montenegrins	Bosnians,Ethiopians	0.000206793	6.86175e-05	3.0137
Macedonians	Ukrainians,French	0.000207006	4.51117e-05	4.58873
Kosovars	Ethiopians,Montenegrins	0.000207101	8.57425e-05	2.41539
French	Serbians,Tuscans	0.000208046	4.30233e-05	4.83566
Poles	Ukrainians,Macedonians	0.000208389	6.71068e-05	3.10533
Macedonians	Russians,Serbians	0.000208423	4.89899e-05	1,04,2544
Greeks	Kosovars,Montenegrins	0.000209105	4.81401e-05	4.34367
Belarusians	Ukrainians,Montenegrins	0.000210004	4.74351e-05	4.42718
Tuscans	Turks,Belarusians	0.000210184	8.1185e-05	2.58896
Macedonians	Bosnians,Hungarians	0.00021032	4.75467e-05	4.42345
Macedonians	Kosovars,Montenegrins	0.000210637	5.63357e-05	3.73896
Ukranians	Russians,Ethiopians	0.000210806	5.46708e-05	3.85592
Serbians	Italians_Abruzzo,French	0.000211098	3.59308e-05	5.87513
Belarusians	Ukrainians,Romanians	0.000211553	4.73629e-05	4.46664
Montenegrins	Serbians,Ethiopians	0.000211684	6.71862e-05	3.1507
Montenegrins	Bosnians,Greeks	0.000211771	4.61928e-05	1,04,5845
Serbians	Greeks,Romanians	0.000212866	3.96896e-05	5.36328
Romanians	Ukrainians,French	0.00021297	3.98724e-05	5.34128
French	North_Italians,Romanians	0.000213272	3.63201e-05	5.87201
Montenegrins	Armenians,Bosnians	0.000213436	5.25663e-05	4.06032
Tuscans	Bosnians,Italians_Abruzzo	0.000214126	7.50797e-05	2.85199
French	Bosnians,Italians_Abruzzo	0.000214127	3.17104e-05	6.75256
Tuscans	Italians_Abruzzo,Croats	0.000214442	7.36731e-05	2.91073
Tuscans	Turks,Hungarians	0.000214793	7.47209e-05	1,02,8746
Montenegrins	Kosovars,Romanians	0.000214852	5.45632e-05	3.93768
Russians	Turks,Poles	0.000214942	4.89573e-05	4.39041
Belarusians	Ukrainians,Bulgarians	0.000214953	4.79484e-05	4.48301
Poles	Ukrainians,French	0.000215227	6.3402e-05	3.39465
Belarusians	Ukrainians,North_Italians	0.000215578	5.01819e-05	4.29594
Croats	Macedonians,Romanians	0.000215667	3.98457e-05	5.41257
Hungarians	French,Ethiopians	0.000215937	5.45193e-05	3.96075
Poles	Ukrainians,Montenegrins	0.000216785	6.73161e-05	1,03,2204
Hungarians	Macedonians,Serbians	0.000217441	3.98598e-05	5.45515
French	Kosovars,Hungarians	0.000217488	3.96196e-05	5.48939
Romanians	Ukrainians,Serbians	0.000217673	4.1259e-05	5.27578
Montenegrins	Tuscans,Bosnians	0.000218491	6.26907e-05	3.48522
Italians	French,Greeks	0.000218627	3.21222e-05	6.80611
Kosovars	Serbians,Armenians	0.000219347	6.81023e-05	3.22085
Montenegrins	Italians_Abruzzo,Hungarians	0.000219754	4.78435e-05	4.59319
Montenegrins	Russians,Ethiopians	0.000219921	6.65646e-05	3.30387
French	Russians,Ethiopians	0.000220807	5.1708e-05	4.27026
Croats	Serbians,Greeks	0.000220895	3.6558e-05	6.04232
Bosnians	North_Italians,Macedonians	0.000221523	5.03985e-05	4.39543
Macedonians	Armenians,Romanians	0.000221671	4.95334e-05	4.47519
Romanians	Russians,French	0.000221693	3.96376e-05	5.593
Serbians	Russians,Croats	0.000221964	3.85368e-05	5.75978
Croats	Serbians,Italians_Abruzzo	0.000222065	3.77546e-05	1,05,8818
Macedonians	Bosnians,Croats	0.000222577	4.68442e-05	4.75143
Romanians	Serbians,Bosnians	0.000222695	4.34348e-05	5.12711
Montenegrins	Russians,Turks	0.000224334	5.01044e-05	4.47732
Bosnians	Macedonians,Greeks	0.00022474	4.64473e-05	4.83859
Romanians	Tuscans,Greeks	0.000224939	5.01855e-05	4.48215
North	Tuscans,Croats	0.000225165	5.98026e-05	3.76514
Romanians	Serbians,Croats	0.000225322	4.09831e-05	5.49793
Bosnians	Kosovars,Bulgarians	0.000225538	5.63919e-05	3.99948
Macedonians	North_Italians,Armenians	0.000226337	5.49569e-05	4.11845
Greeks	Bulgarians,Romanians	0.000226977	3.93066e-05	5.77453
Romanians	Tuscans,French	0.000228705	5.03602e-05	4.54137
Greeks	North_Italians,Poles	0.000229221	5.16686e-05	4.43636
Bulgarians	North_Italians,French	0.00022941	4.81026e-05	4.76919
Croats	French,Greeks	0.000229769	3.55195e-05	6.46881
Tuscans	Serbians,Italians_Abruzzo	0.000230957	7.42315e-05	3.11132
French	Ethiopians,Croats	0.00023112	5.01711e-05	4.60664
Romanians	Serbians,Hungarians	0.00023112	4.08581e-05	5.65666
French	Turks,Hungarians	0.000231277	3.43768e-05	6.72771
Poles	Ukrainians,Bosnians	0.000231571	6.60401e-05	3.50651
Bosnians	Tuscans,Montenegrins	0.000231687	6.00386e-05	3.85896
North	Ukrainians,Tuscans	0.000231953	6.28761e-05	3.68904
Greeks	Romanians,Montenegrins	0.000232782	4.02863e-05	5.77819
Tuscans	Italians_Abruzzo,Montenegrins	0.000233402	7.68326e-05	3.0378
Greeks	North_Italians,Tuscans	0.000233545	5.27859e-05	4.42438
Greeks	Russians,North_Italians	0.000234371	4.4749e-05	5.23745
French	Russians,Turks	0.000234835	3.58032e-05	6.55906
Belarusians	Ukrainians,Greeks	0.000234911	4.82771e-05	1,04,8659
Romanians	Serbians,Montenegrins	0.000235834	4.28217e-05	5.50733
Hungarians	Turks,Serbians	0.000236241	4.19411e-05	5.63269
Bosnians	Armenians,Montenegrins	0.000236742	5.18825e-05	4.56303
Italians	Tuscans,Romanians	0.000236786	4.39623e-05	5.38612
Bulgarians	North_Italians,Tuscans	0.000237376	6.34344e-05	3.74207
Romanians	Belarusians,French	0.000237452	4.52738e-05	1,05,2448
Greeks	North_Italians,Croats	0.00023804	4.14676e-05	5.74039
Belarusians	Ukrainians,Kosovars	0.000238149	5.32819e-05	1,04,4696
Bosnians	Greeks,Montenegrins	0.000238406	4.76675e-05	5.00144
Bulgarians	Ukrainians,Bosnians	0.000238506	5.0251e-05	1,04,7463
Italians	North_Italians,Tuscans	0.000239156	4.82572e-05	4.95587
Romanians	Ethiopians,Greeks	0.000240499	5.99785e-05	4.00976
Kosovars	Armenians,Hungarians	0.000241044	7.00265e-05	3.44218
Bosnians	Macedonians,Tuscans	0.000241521	5.86469e-05	4.11822
Ukranians	Hungarians,Croats	0.000241788	3.44935e-05	7.00965
Croats	North_Italians,Macedonians	0.000242219	4.56379e-05	1,05,3074
Macedonians	Kosovars,Armenians	0.000242256	5.79174e-05	4.18278
North	Tuscans,Poles	0.000242543	7.33289e-05	3.30761
Belarusians	Ukrainians,Tuscans	0.000242693	5.58502e-05	4.34543
Bosnians	Ethiopians,Montenegrins	0.000243385	6.55162e-05	3.71488
Macedonians	North_Italians,Turks	0.000243451	5.19683e-05	4.68461
Greeks	Turks,Italians_Abruzzo	0.000243855	3.54642e-05	1,06,8761
Montenegrins	Turks,Hungarians	0.000244418	4.78075e-05	5.11255
Croats	Bulgarians,Romanians	0.000244712	3.91189e-05	6.25559
Montenegrins	North_Italians,Serbians	0.000245522	5.1339e-05	4.78237
Montenegrins	Serbians,Romanians	0.000246902	4.87208e-05	5.06769
Croats	Macedonians,Bulgarians	0.000247161	3.98124e-05	6.20814
Hungarians	Bulgarians,Montenegrins	0.000247252	4.2832e-05	1,05,7726
Macedonians	Hungarians,Croats	0.000247366	4.3736e-05	5.65589
Tuscans	Macedonians,Armenians	0.000248461	7.96458e-05	3.11958
North	Russians,Tuscans	0.000249613	6.36383e-05	3.92237
Bosnians	Turks,Macedonians	0.00024976	4.84557e-05	5.15441
Bosnians	Italians_Abruzzo,Montenegrins	0.000250962	4.83072e-05	5.19513
Serbians	Ukrainians,Hungarians	0.000251371	3.93308e-05	6.39121
Poles	Russians,Turks	0.000251616	6.70527e-05	3.75252
Tuscans	North_Italians,Italians_Abruzzo	0.00025163	7.55613e-05	3.33014
Croats	Kosovars,Serbians	0.000251655	4.46718e-05	5.63343
Kosovars	Greeks,Montenegrins	0.000251698	6.94723e-05	3.623
Ukranians	Bosnians,Hungarians	0.000251966	3.74249e-05	6.73257
Tuscans	Italians_Abruzzo,Romanians	0.000254	7.34678e-05	3.45729
Montenegrins	Kosovars,Macedonians	0.000254391	5.60102e-05	4.54187
North	Bosnians,Italians_Abruzzo	0.00025594	5.02196e-05	5.09641
Serbians	North_Italians,Kosovars	0.000256224	5.2688e-05	4.86305
Romanians	Bosnians,Hungarians	0.000256864	4.5677e-05	5.62347
Serbians	Tuscans,Romanians	0.000257153	5.14038e-05	5.0026
Italians	Tuscans,Montenegrins	0.000257384	4.77378e-05	5.39162
Tuscans	North_Italians,Greeks	0.000257837	7.93513e-05	3.24931
Kosovars	Bosnians,Ethiopians	0.000258577	8.59348e-05	3.00899
Serbians	Kosovars,Tuscans	0.000259325	5.83336e-05	4.44556
Italians	Serbians,Tuscans	0.000259829	4.37114e-05	5.94418
Tuscans	Armenians,Bulgarians	0.000260034	7.93359e-05	3.27763
Croats	Armenians,French	0.000260068	4.10919e-05	6.32893
Montenegrins	Armenians,French	0.000260243	4.88127e-05	5.33146
Hungarians	Armenians,Bosnians	0.000260571	4.63764e-05	1,05,6186
Bulgarians	Ethiopians,Romanians	0.000261215	6.76824e-05	3.85943
Serbians	Italians_Abruzzo,Bulgarians	0.000262664	4.17841e-05	6.28623
Serbians	Macedonians,Ethiopians	0.000263237	6.26992e-05	4.19841
Italians	North_Italians,Macedonians	0.000264205	4.03263e-05	6.55168
Hungarians	North_Italians,Montenegrins	0.000264393	4.80122e-05	5.50678
Macedonians	North_Italians,Greeks	0.000265357	5.05212e-05	5.25239
Romanians	French,Poles	0.000265444	4.83285e-05	1,05,4925
Greeks	Ukrainians,North_Italians	0.000265466	4.33773e-05	6.11994
Armenians	Russians,Ethiopians	0.000265647	6.86634e-05	3.86883
Macedonians	North_Italians,Ethiopians	0.000265881	7.25993e-05	1,03,6623
North	Turks,Belarusians	0.000266606	5.74948e-05	4.63704
Tuscans	Turks,Serbians	0.000266721	7.74711e-05	3.44285
Poles	Ukrainians,Romanians	0.000267702	6.58049e-05	4.06811
Romanians	Kosovars,Montenegrins	0.000267883	5.17361e-05	5.17787
Montenegrins	North_Italians,Bosnians	0.000268475	5.5323e-05	4.85286
Poles	Ukrainians,Greeks	0.000268912	6.72983e-05	3.99582
Montenegrins	Turks,Bosnians	0.000269542	5.06891e-05	5.31755
North	Tuscans,Hungarians	0.000271396	6.05442e-05	4.48261
Romanians	Serbians,Belarusians	0.000271663	4.5274e-05	6.00042
Bulgarians	Belarusians,Bosnians	0.000272731	5.26538e-05	5.1797
Tuscans	Kosovars,French	0.000272758	8.23171e-05	1,03,3135
Croats	Serbians,Armenians	0.000274743	4.3524e-05	6.31245
Hungarians	Serbians,Italians_Abruzzo	0.000275097	3.94326e-05	6.97638
Italians	Tuscans,Croats	0.000276344	4.48475e-05	6.16186
Italians	Tuscans,Bosnians	0.00027666	4.7344e-05	5.84361
Italians	Macedonians,Greeks	0.000276945	3.50879e-05	7.89291
Poles	Ukrainians,Bulgarians	0.000277284	6.76564e-05	4.09841
French	Russians,Bulgarians	0.00027758	3.41919e-05	8.1183
Bulgarians	Tuscans,Italians_Abruzzo	0.000277627	5.52312e-05	5.02664
Italians	North_Italians,Romanians	0.000278087	3.93428e-05	7.06831
Hungarians	Macedonians,Montenegrins	0.000278237	4.42266e-05	6.29117
Montenegrins	Kosovars,Bulgarians	0.000279159	5.7569e-05	4.84912
Italians	North_Italians,Bulgarians	0.000279408	4.12485e-05	6.77377
Italians	North_Italians,Kosovars	0.000279435	4.56538e-05	6.12074
Kosovars	Armenians,French	0.000279591	6.7398e-05	4.14836
Greeks	Macedonians,Romanians	0.000279754	3.94686e-05	7.08802
Serbians	Italians_Abruzzo,Romanians	0.000280195	3.96986e-05	7.05806
Greeks	Macedonians,Montenegrins	0.000280486	4.19348e-05	6.68862
North	Serbians,Italians_Abruzzo	0.000280986	5.03154e-05	1,05,5845
Greeks	North_Italians,Hungarians	0.000281061	4.16577e-05	6.74693
Croats	Turks,Montenegrins	0.000281219	4.22801e-05	6.65133
Bulgarians	Ukrainians,Croats	0.000281742	4.81121e-05	5.85594
Macedonians	Kosovars,Greeks	0.000282018	5.45833e-05	5.16674
Tuscans	Ukrainians,Turks	0.000282256	7.89413e-05	3.57551
Kosovars	Ethiopians,Croats	0.000282332	8.29161e-05	3.40503
Poles	Ukrainians,Kosovars	0.000283111	7.15685e-05	3.95581
Tuscans	Turks,Montenegrins	0.000283357	7.93613e-05	3.57047
Serbians	Hungarians,Poles	0.000283885	4.79657e-05	1,05,9185
Bulgarians	Bosnians,Poles	0.00028422	5.97236e-05	4.75892
Romanians	Bosnians,Croats	0.000284372	4.36519e-05	6.51454
French	Hungarians,Romanians	0.000284544	3.15635e-05	9.01494
Belarusians	Ukrainians,Italians_Abruzzo	0.00028459	4.82259e-05	1,05,9012
Greeks	North_Italians,Belarusians	0.000284799	4.74027e-05	6.00807
Bosnians	North_Italians,Romanians	0.000285282	4.76139e-05	5.99156
Kosovars	Turks,Montenegrins	0.000287117	7.2104e-05	3.98199
Hungarians	North_Italians,Macedonians	0.000288263	4.59881e-05	1,06,2682
Bosnians	Italians_Abruzzo,French	0.000288764	4.20434e-05	6.86823
Hungarians	Romanians,Montenegrins	0.000288829	4.3031e-05	6.71212
Hungarians	Serbians,Greeks	0.00028891	3.91389e-05	7.38166
French	Macedonians,Tuscans	0.000289482	4.76876e-05	6.07039
Montenegrins	Serbians,Bulgarians	0.000289829	5.16585e-05	5.61048
Serbians	Belarusians,Hungarians	0.000290503	4.1844e-05	6.94252
Bosnians	Greeks,Romanians	0.000290687	4.56484e-05	6.36795
Montenegrins	Kosovars,Tuscans	0.000290826	6.94312e-05	4.18869
Serbians	Macedonians,Armenians	0.000290849	4.67208e-05	6.22526
Macedonians	Bosnians,Poles	0.000291266	5.69419e-05	5.11515
Romanians	Kosovars,Greeks	0.00029156	4.6905e-05	6.21597
Macedonians	Russians,French	0.000291687	4.51238e-05	6.46414
Armenians	Turks,Italians_Abruzzo	0.000291799	3.90895e-05	1,07,4649
Bulgarians	Russians,Bosnians	0.00029195	5.0959e-05	5.72911
French	Bulgarians,Poles	0.000292059	4.56726e-05	6.39461
North	Tuscans,Bulgarians	0.000292737	6.25086e-05	4.68315
French	Hungarians,Bulgarians	0.000292822	3.32848e-05	8.79747
Tuscans	North_Italians,Romanians	0.00029293	7.90209e-05	3.707
Italians	Greeks,Romanians	0.000293016	3.49301e-05	8.38864
Macedonians	Hungarians,French	0.000293149	4.37656e-05	6.69816
Romanians	Tuscans,Ethiopians	0.000293311	7.58577e-05	3.86659
North	Tuscans,Bosnians	0.000293443	6.03784e-05	4.86007
Hungarians	Serbians,Montenegrins	0.000293542	4.03538e-05	7.27422
North	French,Romanians	0.000294121	4.84991e-05	6.06446
Poles	Ukrainians,Tuscans	0.000294567	7.5595e-05	3.89664
Montenegrins	French,Greeks	0.000294591	4.48066e-05	6.57471
French	Armenians,Croats	0.000294852	3.65827e-05	8.05988
Bosnians	Kosovars,Montenegrins	0.00029486	5.65472e-05	5.21441
Montenegrins	North_Italians,Croats	0.00029486	5.1128e-05	5.76709
Montenegrins	Macedonians,Serbians	0.000295069	4.87146e-05	6.05709
Greeks	Serbians,Romanians	0.000295246	3.80393e-05	7.76162
Montenegrins	Serbians,French	0.000295722	4.63206e-05	6.38425
Kosovars	Italians_Abruzzo,Poles	0.000296972	7.34647e-05	4.04237
French	Tuscans,Bulgarians	0.000298671	4.56215e-05	6.54671
Italians	Greeks,Bulgarians	0.000298987	3.63605e-05	8.22284
Kosovars	Belarusians,Italians_Abruzzo	0.000299222	6.83477e-05	4.37794
North	Turks,Poles	0.000299248	6.23772e-05	4.79739
Bosnians	Tuscans,Bulgarians	0.000299788	5.74275e-05	5.22028
Hungarians	Ukrainians,Poles	0.000299995	4.55261e-05	6.58952
French	Tuscans,Montenegrins	0.000300015	4.76927e-05	6.29058
Bosnians	North_Italians,Bulgarians	0.000300494	5.14685e-05	5.83841
North	French,Bulgarians	0.000300703	4.93589e-05	6.09217
Hungarians	Bulgarians,Romanians	0.000301493	4.12564e-05	7.30779
Romanians	Hungarians,Croats	0.00030151	4.20772e-05	7.16563
North	Serbians,Tuscans	0.000301659	5.96647e-05	5.05589
Greeks	Macedonians,Bulgarians	0.000302974	4.11854e-05	7.35634
North	Bosnians,Ethiopians	0.000303559	7.33851e-05	4.13652
Kosovars	Italians_Abruzzo,Montenegrins	0.000303585	6.8142e-05	4.45518
Tuscans	Kosovars,Italians_Abruzzo	0.000303623	8.13527e-05	3.73219
French	Macedonians,Hungarians	0.000304177	3.35503e-05	9.06631
Montenegrins	Serbians,Croats	0.000304385	4.51965e-05	6.73469
North	Kosovars,Tuscans	0.00030476	7.00169e-05	4.35266
Romanians	Italians_Abruzzo,Greeks	0.00030477	3.96009e-05	7.69603
Bulgarians	Armenians,Greeks	0.000304792	4.98657e-05	6.11225
Poles	Ukrainians,North_Italians	0.000305157	6.97493e-05	4.37506
Tuscans	North_Italians,Montenegrins	0.000305234	8.30697e-05	3.67443
Croats	Serbians,Ethiopians	0.000305412	5.62015e-05	5.43424
French	Russians,Macedonians	0.000305639	3.51977e-05	1,08,6835
Tuscans	Armenians,Romanians	0.000305824	7.94206e-05	3.85069
Croats	Tuscans,Montenegrins	0.000306181	5.19931e-05	5.88888
Hungarians	Macedonians,Romanians	0.000306184	4.1489e-05	7.37988
French	North_Italians,Tuscans	0.000306636	4.91656e-05	6.23681
Greeks	Serbians,Bulgarians	0.000306806	4.03408e-05	7.60536
Serbians	Russians,Hungarians	0.000307361	3.97278e-05	7.73666
Macedonians	Tuscans,French	0.000307844	5.30876e-05	5.79879
Hungarians	Italians_Abruzzo,French	0.000307956	3.77128e-05	8.16581
Kosovars	Bosnians,Greeks	0.000308152	6.76155e-05	4.55742
Tuscans	Turks,Croats	0.00030832	7.73051e-05	3.98834
French	Hungarians,Montenegrins	0.000308593	3.40933e-05	9.05142
Romanians	Tuscans,Armenians	0.000309175	5.39358e-05	5.73228
Tuscans	Macedonians,Italians_Abruzzo	0.000310172	7.49391e-05	4.13899
Bosnians	Greeks,Bulgarians	0.000310549	4.77388e-05	6.50517
Italians	North_Italians,Montenegrins	0.000310989	4.10996e-05	7.56671
Romanians	Serbians,Poles	0.000311402	5.08472e-05	6.12427
Romanians	Hungarians,French	0.000312408	4.04151e-05	7.72998
Montenegrins	Tuscans,Hungarians	0.000312983	5.80275e-05	1,05,3937
North	Macedonians,Tuscans	0.000313441	6.20229e-05	5.05363
Croats	North_Italians,Romanians	0.000313578	4.22658e-05	7.41919
Macedonians	Ukrainians,Bosnians	0.000314448	4.86248e-05	6.46682
Belarusians	Ukrainians,Turks	0.000314764	5.03169e-05	6.25563
Montenegrins	Romanians,Croats	0.000314896	4.84378e-05	6.50104
Hungarians	Kosovars,Bosnians	0.000315091	4.86034e-05	6.48289
Hungarians	Serbians,Ethiopians	0.000315283	5.73914e-05	5.49355
Tuscans	Italians_Abruzzo,Bulgarians	0.000315673	7.4827e-05	1,04,2187
Serbians	Turks,Bulgarians	0.000315937	4.41559e-05	7.15503
Bulgarians	Ukrainians,Hungarians	0.000317022	4.97326e-05	6.37454
Croats	North_Italians,Bulgarians	0.000317201	4.36829e-05	7.26145
Hungarians	Macedonians,Bulgarians	0.000319194	4.31403e-05	7.39897
Romanians	North_Italians,Italians_Abruzzo	0.000319699	4.51087e-05	7.0873
Macedonians	Belarusians,Bosnians	0.000320566	5.21366e-05	6.14858
Macedonians	Turks,Romanians	0.000321098	4.8203e-05	6.66136
Tuscans	Ethiopians,Romanians	0.000321688	9.33965e-05	3.44433
Montenegrins	Turks,French	0.000321735	4.69994e-05	1,06,8455
Romanians	North_Italians,Tuscans	0.000322069	5.69385e-05	5.65644
Greeks	French,Romanians	0.000322818	3.68746e-05	8.75449
Croats	French,Ethiopians	0.0003238	5.37074e-05	6.02896
Montenegrins	Serbians,Bosnians	0.000323837	4.90272e-05	6.60527
Greeks	French,Bulgarians	0.00032475	3.81371e-05	8.51533
Croats	Italians_Abruzzo,Montenegrins	0.000325141	4.05644e-05	8.01542
French	Greeks,Croats	0.000325152	3.18042e-05	1,10,2235
North	Italians_Abruzzo,Montenegrins	0.0003252	5.26592e-05	6.17555
Belarusians	Russians,Turks	0.000325405	4.87392e-05	6.67645
Bulgarians	Belarusians,Croats	0.000325502	4.97489e-05	6.54289
French	Belarusians,Bulgarians	0.000326233	3.79423e-05	8.59812
Greeks	Tuscans,French	0.000326584	4.75143e-05	6.87339
Greeks	French,Montenegrins	0.000327448	3.89011e-05	8.41745
Montenegrins	North_Italians,Kosovars	0.000329493	6.34145e-05	5.19587
Hungarians	North_Italians,Bulgarians	0.00032951	4.50091e-05	7.32098
Tuscans	Hungarians,Greeks	0.000329749	7.66899e-05	4.29977
Kosovars	Russians,Italians_Abruzzo	0.000330135	6.67283e-05	4.94745
Hungarians	Macedonians,Tuscans	0.000330308	5.42942e-05	6.08366
Croats	Macedonians,Tuscans	0.000330494	5.12773e-05	6.44524
North	Macedonians,French	0.000330595	5.11958e-05	6.45747
Montenegrins	French,Ethiopians	0.000331351	6.33522e-05	1,05,2303
North	Serbians,Ethiopians	0.000331403	6.86754e-05	4.82563
French	Romanians,Poles	0.000331507	4.31372e-05	7.68494
Poles	Ukrainians,Italians_Abruzzo	0.000331803	6.89878e-05	4.80959
Serbians	Kosovars,Italians_Abruzzo	0.000331991	4.78539e-05	1,06,9376
French	Russians,Montenegrins	0.000332236	3.57941e-05	9.28186
Hungarians	Ukrainians,Belarusians	0.000332925	4.18036e-05	7.96402
Ukranians	Bosnians,Croats	0.000333238	3.74963e-05	8.88721
Bulgarians	Tuscans,Armenians	0.000333267	6.16971e-05	5.40166
Romanians	Russians,Bosnians	0.000333328	4.46206e-05	7.47026
Tuscans	Italians_Abruzzo,Greeks	0.00033383	7.42238e-05	4.49762
Tuscans	Turks,Bosnians	0.000334408	7.86564e-05	1,04,2515
Kosovars	North_Italians,Montenegrins	0.000335138	7.22902e-05	4.63601
Tuscans	North_Italians,Macedonians	0.000335221	8.20022e-05	4.08795
French	Serbians,Italians_Abruzzo	0.000335877	3.26122e-05	1,10,2991
Kosovars	Serbians,Ethiopians	0.000336089	8.21421e-05	4.09156
Hungarians	Tuscans,Montenegrins	0.000336424	5.44425e-05	6.17944
Greeks	Armenians,Italians_Abruzzo	0.000336537	3.6842e-05	9.13458
Hungarians	Serbians,Armenians	0.00033659	4.46998e-05	1,07,1953
Montenegrins	Bosnians,Romanians	0.000336976	4.94011e-05	6.82123
Tuscans	Ethiopians,Greeks	0.000337248	9.25119e-05	3.64546
Bosnians	Macedonians,Italians_Abruzzo	0.000337567	4.77535e-05	7.06894
North	Turks,Hungarians	0.000337772	5.36698e-05	6.29352
Montenegrins	Bulgarians,Poles	0.000337888	5.9798e-05	5.65048
Montenegrins	Bulgarians,Croats	0.00033799	5.01078e-05	6.74526
Greeks	Bosnians,Bulgarians	0.000338124	4.05654e-05	8.33529
Kosovars	Macedonians,Greeks	0.00033886	6.57275e-05	5.15552
Serbians	Tuscans,French	0.000338929	4.60175e-05	7.36522
North	Belarusians,Greeks	0.00033957	5.52204e-05	6.14936
Belarusians	Ukrainians,Armenians	0.000340538	5.46101e-05	1,06,2358
Montenegrins	Macedonians,Croats	0.00034074	4.72696e-05	7.20844
Croats	Greeks,Montenegrins	0.000340842	4.08017e-05	8.35362
Hungarians	Ukrainians,Russians	0.000341193	3.84255e-05	8.87933
Montenegrins	Macedonians,Greeks	0.000341553	4.81207e-05	7.09784
Croats	Macedonians,Greeks	0.000341655	4.09945e-05	8.33417
Tuscans	Turks,Macedonians	0.000342648	7.81941e-05	4.38201
Macedonians	Tuscans,Greeks	0.000342741	5.5387e-05	6.18811
Ukranians	Hungarians,Romanians	0.000342799	3.78192e-05	9.06413
North	Hungarians,Greeks	0.000343308	5.15103e-05	6.66484
North	Serbians,Armenians	0.000343334	5.5019e-05	6.24027
North	Tuscans,Montenegrins	0.000343427	6.39265e-05	5.37222
Kosovars	Ukrainians,Greeks	0.000343501	6.80466e-05	5.04802
French	Bosnians,Ethiopians	0.000343534	5.54534e-05	6.195
Tuscans	North_Italians,Kosovars	0.000343902	8.67344e-05	3.965
Montenegrins	Romanians,Poles	0.000344037	5.74715e-05	5.98621
Hungarians	North_Italians,Romanians	0.00034437	4.60205e-05	7.48297
Hungarians	Tuscans,French	0.000345002	4.70324e-05	7.33542
Kosovars	Ukrainians,Italians_Abruzzo	0.000345664	6.69288e-05	5.16465
Bulgarians	Russians,Croats	0.000346076	4.98455e-05	6.94297
Italians	Hungarians,Greeks	0.000346532	3.56169e-05	9.72942
Russians	Turks,Belarusians	0.000346648	4.18845e-05	8.27628
Kosovars	Belarusians,Greeks	0.000346738	7.15212e-05	4.84804
Belarusians	Ukrainians,Ethiopians	0.000346822	6.52282e-05	5.31705
Tuscans	North_Italians,Serbians	0.000347003	7.97061e-05	4.35353
Kosovars	Bosnians,Italians_Abruzzo	0.000347483	6.80162e-05	5.10882
Bosnians	Tuscans,Romanians	0.00034757	5.43138e-05	6.39929
Romanians	Ukrainians,Bosnians	0.000347696	4.50683e-05	7.71488
Romanians	Armenians,Greeks	0.000348344	4.33295e-05	8.03942
Montenegrins	Bosnians,Bulgarians	0.000348481	5.25014e-05	6.63756
Montenegrins	Russians,Macedonians	0.000348989	5.03666e-05	6.92898
North	French,Montenegrins	0.000350049	4.98982e-05	7.01526
Italians	Russians,Turks	0.000350264	3.7928e-05	9.23496
Italians	Tuscans,Hungarians	0.000350613	4.58874e-05	7.64072
Armenians	Turks,Tuscans	0.000350625	4.97812e-05	7.04332
French	Belarusians,Montenegrins	0.000350723	3.84612e-05	9.11888
Hungarians	Tuscans,Bulgarians	0.000350852	5.16607e-05	6.79146
Russians	Armenians,Poles	0.000351747	5.44907e-05	6.45517
Kosovars	Serbians,Greeks	0.00035344	6.56822e-05	5.38106
French	Ukrainians,Bulgarians	0.000354115	3.45449e-05	1,10,2509
Tuscans	Kosovars,Armenians	0.000354308	8.70253e-05	4.07132
Italians	North_Italians,Serbians	0.000355202	3.83368e-05	1,09,2653
Tuscans	North_Italians,Bosnians	0.000355218	8.23629e-05	4.31284
Montenegrins	Macedonians,Bosnians	0.000355219	4.94613e-05	7.18177
North	Tuscans,Romanians	0.000355731	6.12964e-05	5.80346
Montenegrins	Serbians,Hungarians	0.000355865	4.75218e-05	7.48845
Bosnians	North_Italians,Kosovars	0.000355879	5.86203e-05	6.07091
Tuscans	North_Italians,Bulgarians	0.000355924	7.98431e-05	1,04,4578
Ukranians	Macedonians,Hungarians	0.000356093	3.95262e-05	9.00904
Ukranians	Serbians,Hungarians	0.000356246	3.83265e-05	9.29503
North	Kosovars,Italians_Abruzzo	0.000356754	5.74017e-05	6.21503
North	Italians_Abruzzo,Bulgarians	0.000356781	5.34901e-05	6.67003
Italians	Kosovars,French	0.000356794	3.98876e-05	8.94497
French	Turks,Croats	0.000357631	3.44304e-05	1,10,3871
Kosovars	Greeks,Poles	0.0003577	7.40425e-05	4.83101
Greeks	Bosnians,Romanians	0.000357987	4.02007e-05	8.90498
North	Italians_Abruzzo,Romanians	0.000358101	5.03632e-05	7.11038
Kosovars	Turks,Poles	0.000358103	7.8685e-05	1,04,5511
Hungarians	Kosovars,Serbians	0.000358287	4.64484e-05	7.71365
North	Ukrainians,Greeks	0.000358903	5.23601e-05	6.85452
Serbians	Armenians,Bulgarians	0.000359191	4.70381e-05	7.63617
French	Belarusians,Romanians	0.000359499	3.6839e-05	9.75867
North	Armenians,Bosnians	0.000360179	5.54061e-05	6.50071
Italians	Serbians,Greeks	0.000360345	3.4413e-05	1,10,4712
Montenegrins	Hungarians,Romanians	0.000360578	4.76233e-05	7.57146
Romanians	Tuscans,Italians_Abruzzo	0.000360999	4.79639e-05	7.52648
Montenegrins	Kosovars,Italians_Abruzzo	0.000361047	5.49804e-05	6.56684
Croats	Ukrainians,Poles	0.000361449	4.26153e-05	8.48167
Greeks	Macedonians,French	0.000361481	3.79977e-05	9.51323
Italians	Greeks,Croats	0.000361515	3.36782e-05	1,10,7344
Macedonians	Ukrainians,Croats	0.000361671	4.72338e-05	7.65705
Serbians	North_Italians,Greeks	0.000361911	4.43414e-05	8.16192
Serbians	Kosovars,Turks	0.00036265	4.8345e-05	1,07,5013
Montenegrins	Russians,Bulgarians	0.00036327	5.33855e-05	6.80466
Croats	Turks,Macedonians	0.000364823	4.31481e-05	8.45512
French	Bosnians,Hungarians	0.000364896	3.45836e-05	1,10,5511
Montenegrins	Macedonians,Tuscans	0.000365053	6.02499e-05	6.05898
North	Ethiopians,Montenegrins	0.000365241	7.67349e-05	4.75977
Serbians	Ethiopians,Bulgarians	0.000365395	6.32614e-05	5.77595
North	Ukrainians,Turks	0.000365791	5.3587e-05	6.82613
Kosovars	Russians,Greeks	0.000366042	6.82177e-05	1,05,3658
Armenians	Kosovars,Turks	0.000366363	4.79209e-05	7.64517
Macedonians	Italians_Abruzzo,Greeks	0.000366399	4.58708e-05	7.98762
Bosnians	Kosovars,Tuscans	0.000367195	6.54876e-05	5.60709
French	Tuscans,Romanians	0.000368247	4.39057e-05	8.38723
French	Serbians,Hungarians	0.000368736	3.22124e-05	11.447
Tuscans	Kosovars,Turks	0.000370046	8.5672e-05	4.31934
Kosovars	Turks,Belarusians	0.000370078	7.2509e-05	5.10388
Bosnians	Turks,Bulgarians	0.000370089	5.08672e-05	7.27559
Montenegrins	Macedonians,Hungarians	0.00037117	4.91465e-05	7.55232
Poles	Ukrainians,Turks	0.000371701	6.96811e-05	5.33431
North	Macedonians,Italians_Abruzzo	0.000371984	5.23211e-05	7.10962
French	Poles,Montenegrins	0.000372098	4.41115e-05	8.43539
Ukranians	French,Croats	0.000372469	3.52792e-05	1,10,5578
Croats	Italians_Abruzzo,French	0.000372656	3.69107e-05	10.0962
Croats	Kosovars,Romanians	0.0003733	4.76985e-05	7.82625
French	Ukrainians,Montenegrins	0.000373656	3.40815e-05	1,10,9636
Kosovars	Tuscans,Montenegrins	0.000373806	8.15209e-05	1,04,5854
French	Russians,Romanians	0.000375259	3.38991e-05	11.0699
Montenegrins	Macedonians,French	0.000375586	4.60561e-05	8.15496
Italians	Ukrainians,Tuscans	0.000375982	4.73892e-05	7.93393
Macedonians	Russians,Bosnians	0.000376037	4.92095e-05	7.64156
Montenegrins	Ukrainians,Serbians	0.000376793	4.92612e-05	7.64888
Ukranians	Hungarians,Montenegrins	0.000377174	4.07087e-05	9.26519
Italians	Greeks,Montenegrins	0.000377216	3.57014e-05	1,10,5659
Tuscans	North_Italians,Hungarians	0.000377266	7.93881e-05	4.75217
Macedonians	Belarusians,Croats	0.000377325	4.87959e-05	7.73272
Montenegrins	Kosovars,Turks	0.000377515	5.66219e-05	6.66729
French	North_Italians,Kosovars	0.000377781	4.65711e-05	8.11192
French	Kosovars,Croats	0.000378184	4.06242e-05	9.30931
Romanians	Belarusians,Bosnians	0.000378521	4.92967e-05	7.67842
Kosovars	Macedonians,Armenians	0.000378622	7.08088e-05	1,05,3471
Kosovars	Hungarians,Ethiopians	0.000379093	8.47008e-05	4.47567
Macedonians	North_Italians,Italians_Abruzzo	0.000379139	5.02834e-05	7.54004
North	Kosovars,Hungarians	0.000379619	5.97439e-05	1,06,3541
Italians	North_Italians,Bosnians	0.000380248	4.13331e-05	9.19962
Ukranians	Hungarians,Bulgarians	0.000380943	3.89978e-05	9.76832
Romanians	North_Italians,French	0.000383679	4.37246e-05	1,08,7749
Romanians	Bosnians,Poles	0.000383828	5.28455e-05	1,07,2632
French	Ukrainians,Romanians	0.000383982	3.28327e-05	1,11,6951
Kosovars	Greeks,Croats	0.0003842	6.63443e-05	5.791
Armenians	Turks,Greeks	0.00038448	4.0894e-05	9.40188
Montenegrins	French,Romanians	0.000384627	4.8018e-05	8.01005
Croats	Tuscans,Bulgarians	0.000384773	5.11253e-05	7.52609
Tuscans	Ukrainians,Greeks	0.000384788	7.76994e-05	4.95226
Montenegrins	North_Italians,Hungarians	0.000385014	5.23572e-05	1,07,3536
North	Turks,Croats	0.000385068	5.22893e-05	7.36417
French	Bosnians,Greeks	0.000385272	3.34373e-05	1,11,5222
Kosovars	Bulgarians,Montenegrins	0.000385473	7.45795e-05	5.16862
Bosnians	Macedonians,Armenians	0.00038613	5.19732e-05	1,07,4294
Tuscans	French,Romanians	0.000386294	7.47622e-05	5.16697
North	Greeks,Croats	0.000386329	4.99132e-05	7.74002
Hungarians	Russians,Belarusians	0.000386958	3.89229e-05	9.94167
Croats	Kosovars,Macedonians	0.000386995	5.04842e-05	7.66567
Bosnians	Italians_Abruzzo,Romanians	0.000387443	4.55058e-05	8.51415
Montenegrins	Russians,Serbians	0.000387453	4.84513e-05	7.99674
Italians	Tuscans,French	0.000387659	4.20374e-05	9.22178
Bulgarians	Croats,Poles	0.000388375	5.8819e-05	6.60289
Montenegrins	Macedonians,Romanians	0.000388525	4.77263e-05	8.14069
Montenegrins	Greeks,Romanians	0.000389257	4.72658e-05	8.23549
Italians	Bosnians,Greeks	0.000389772	3.59511e-05	1,10,8418
North	Russians,Greeks	0.000389999	5.37016e-05	7.26233
Tuscans	Greeks,Romanians	0.00039006	7.68308e-05	5.07688
French	Ukrainians,Macedonians	0.00039032	3.4315e-05	1,11,3746
French	Macedonians,Belarusians	0.000390544	3.80335e-05	1,10,2684
North	Tuscans,Greeks	0.000390825	5.89167e-05	6.63351
Greeks	Macedonians,Serbians	0.000391117	4.07367e-05	9.60111
Kosovars	Turks,Serbians	0.000391538	6.8679e-05	5.70099
Montenegrins	Ukrainians,Macedonians	0.000392251	4.98036e-05	7.87594
Tuscans	Belarusians,Greeks	0.000392569	8.20691e-05	1,04,7834
Kosovars	Greeks,Bulgarians	0.000393163	6.93878e-05	5.66617
Montenegrins	Belarusians,Romanians	0.000393404	5.39647e-05	7.29002
Montenegrins	Belarusians,Bulgarians	0.000393437	5.58711e-05	7.04186
Montenegrins	Ukrainians,Romanians	0.000394953	4.92009e-05	8.02735
Montenegrins	North_Italians,Macedonians	0.00039504	5.45727e-05	7.23878
North	Greeks,Poles	0.000395149	5.99326e-05	6.59322
Ukranians	Romanians,Croats	0.000396562	3.79836e-05	1,10,4404
North	Tuscans,Italians_Abruzzo	0.000397032	5.91238e-05	6.71526
French	Macedonians,Poles	0.000397159	4.30582e-05	9.22377
French	Hungarians,Croats	0.000397177	3.14912e-05	1,12,6123
Greeks	Bulgarians,Croats	0.000397468	3.96872e-05	10.015
French	Bulgarians,Croats	0.000397869	3.43004e-05	1,11,5996
Croats	Ethiopians,Montenegrins	0.000398113	6.09322e-05	6.53371
Tuscans	Russians,Greeks	0.000398223	8.01231e-05	4.97014
Montenegrins	Ukrainians,Bulgarians	0.000398386	5.25451e-05	1,07,5818
French	Bosnians,Bulgarians	0.000398646	3.55676e-05	1,11,2081
Russians	Ukrainians,Ethiopians	0.000398922	5.35793e-05	7.44546
Romanians	Russians,Croats	0.000399042	4.16724e-05	1,09,5757
Tuscans	Russians,North_Italians	0.000399049	8.27179e-05	4.82421
Macedonians	Croats,Poles	0.00039941	5.36513e-05	7.44455
French	North_Italians,Greeks	0.000399676	3.65458e-05	1,10,9363
Bosnians	Tuscans,French	0.000399763	5.24307e-05	7.62461
North	Serbians,French	0.000400249	4.8334e-05	1,08,2809
Italians	Russians,Tuscans	0.000400618	4.80884e-05	8.33087
Montenegrins	Macedonians,Poles	0.000400647	5.79539e-05	6.91321
Serbians	Kosovars,Greeks	0.000400749	4.78088e-05	8.38233
Bosnians	Italians_Abruzzo,Bulgarians	0.000401335	4.87185e-05	8.23783
Kosovars	Turks,Bosnians	0.000401342	7.08861e-05	5.66178
Montenegrins	Hungarians,Bulgarians	0.000402155	5.08649e-05	7.90633
Bulgarians	Ethiopians,Greeks	0.000402431	6.62801e-05	6.07167
Romanians	Ukrainians,Croats	0.000402521	4.13647e-05	9.73102
Bosnians	Kosovars,Turks	0.000402833	5.69132e-05	7.07803
Bosnians	Macedonians,Ethiopians	0.000403207	6.88279e-05	5.85818
Ukranians	Serbians,Croats	0.000404211	3.79649e-05	10.647
Greeks	Hungarians,Romanians	0.00040429	3.82494e-05	1,10,5699
Hungarians	Belarusians,Poles	0.000404544	4.9154e-05	8.23014
Tuscans	Turks,Bulgarians	0.000404709	7.88209e-05	5.13454
Hungarians	Turks,Montenegrins	0.000404989	4.57824e-05	8.84594
Croats	Armenians,Montenegrins	0.000405489	4.60754e-05	8.80057
Montenegrins	French,Croats	0.000405664	4.52731e-05	8.96039
Greeks	Romanians,Croats	0.000405741	3.93156e-05	1,10,3201
Tuscans	North_Italians,Poles	0.000406118	8.87552e-05	4.57571
French	Romanians,Croats	0.000408075	3.25538e-05	1,12,5354
Kosovars	Macedonians,Montenegrins	0.000410241	7.23518e-05	5.67009
Greeks	Bosnians,Montenegrins	0.000410267	4.38487e-05	9.35643
Tuscans	Greeks,Poles	0.000410442	8.5017e-05	4.82777
Croats	Ukrainians,Russians	0.000410887	3.53041e-05	1,11,6385
Romanians	Turks,Italians_Abruzzo	0.000410951	4.03967e-05	10.1729
Montenegrins	Kosovars,Greeks	0.000412934	5.54092e-05	7.45244
Italians	Tuscans,Poles	0.000413219	5.85448e-05	7.05817
Bulgarians	Belarusians,Hungarians	0.000413544	5.21308e-05	7.93281
Greeks	Hungarians,Bulgarians	0.0004145	3.99312e-05	1,10,3804
Croats	Kosovars,Bulgarians	0.000414513	4.87002e-05	8.51152
Montenegrins	Bulgarians,Romanians	0.000414819	5.12171e-05	8.09922
Ukranians	Bosnians,French	0.000414928	3.79537e-05	1,10,9325
Poles	Hungarians,Croats	0.000414932	6.40688e-05	6.47635
Croats	Greeks,Romanians	0.000415203	3.92086e-05	1,10,5896
North	Armenians,Montenegrins	0.000415218	5.71403e-05	7.26663
Montenegrins	Bosnians,French	0.000415379	4.74286e-05	8.75798
Montenegrins	Macedonians,Belarusians	0.000415408	5.35873e-05	7.75198
Hungarians	North_Italians,French	0.000415641	4.19968e-05	9.89698
French	Turks,Bosnians	0.000415899	3.68368e-05	1,11,2903
Ukranians	Bulgarians,Croats	0.000416223	3.98927e-05	1,10,4336
Montenegrins	Tuscans,Bulgarians	0.000416583	6.33216e-05	6.57884
Tuscans	Ukrainians,North_Italians	0.000416709	8.21734e-05	5.07109
Kosovars	Armenians,Bulgarians	0.000416955	7.28774e-05	5.72132
Russians	Romanians,Poles	0.000417569	4.62568e-05	9.0272
Italians	Belarusians,Tuscans	0.00041788	5.03009e-05	1,08,3076
Montenegrins	French,Bulgarians	0.000417926	4.89812e-05	8.53239
Croats	Ukrainians,Belarusians	0.000417949	3.8884e-05	1,10,7486
Serbians	Kosovars,Ethiopians	0.0004181	7.4151e-05	5.63849
Bulgarians	Russians,Hungarians	0.000418788	4.942e-05	8.47406
Tuscans	Greeks,Croats	0.000419001	7.74388e-05	5.41074
Montenegrins	Serbians,Poles	0.000419605	5.50437e-05	7.62312
North	Turks,Serbians	0.000419963	5.30715e-05	7.91315
Serbians	North_Italians,Turks	0.000420117	4.7542e-05	8.83674
French	Bosnians,Romanians	0.000420441	3.38053e-05	1,12,4371
Macedonians	North_Italians,French	0.000420528	4.62371e-05	9.09502
Montenegrins	Greeks,Bulgarians	0.000420624	5.18878e-05	8.10642
French	Armenians,Bosnians	0.000421285	3.79076e-05	11.1134
Kosovars	Serbians,Italians_Abruzzo	0.000422198	6.57704e-05	6.41927
Bulgarians	Turks,Italians_Abruzzo	0.000422307	4.89158e-05	8.63334
Kosovars	Hungarians,Greeks	0.000422816	6.7366e-05	6.27639
Croats	Greeks,Bulgarians	0.000423476	4.0062e-05	1,10,5705
Tuscans	North_Italians,Croats	0.000423497	8.13593e-05	5.20526
Greeks	Macedonians,Bosnians	0.000423934	4.25703e-05	9.95845
French	Russians,Serbians	0.000423967	3.30698e-05	1,12,8204
Montenegrins	Turks,Macedonians	0.000424344	5.14388e-05	1,08,2495
Ukranians	Macedonians,Croats	0.000425109	3.8125e-05	11.1504
Kosovars	Greeks,Romanians	0.000426102	6.5594e-05	6.49605
Croats	Macedonians,Italians_Abruzzo	0.000426224	4.02501e-05	1,10,5894
Italians	Ukrainians,Greeks	0.00042694	3.6787e-05	1,11,6057
Montenegrins	Russians,Romanians	0.000427649	4.85484e-05	8.80872
Poles	Ukrainians,Armenians	0.000428581	7.32782e-05	5.84868
Hungarians	Tuscans,Romanians	0.000428705	5.30862e-05	8.07565
Italians	Kosovars,Greeks	0.000429103	4.13424e-05	1,10,3793
Tuscans	Armenians,Greeks	0.000429229	7.82349e-05	5.48642
Montenegrins	Serbians,Belarusians	0.000429233	5.21684e-05	8.22785
Kosovars	French,Ethiopians	0.000429395	8.19199e-05	5.24164
Hungarians	Italians_Abruzzo,Montenegrins	0.000429653	4.38758e-05	9.79249
Tuscans	Macedonians,Greeks	0.000430162	7.85614e-05	5.47549
Macedonians	Turks,Tuscans	0.000430255	5.80371e-05	7.41344
French	Italians_Abruzzo,Montenegrins	0.00043029	3.47554e-05	1,12,3805
Macedonians	Ukrainians,Hungarians	0.000430687	4.6012e-05	9.36032
Hungarians	Macedonians,Greeks	0.00043072	4.12511e-05	1,10,4414
Greeks	Hungarians,Montenegrins	0.000432969	4.01276e-05	1,10,7898
French	North_Italians,Turks	0.000433417	4.07386e-05	10.639
Macedonians	Russians,Croats	0.000434151	4.71672e-05	1,09,2045
Tuscans	Serbians,Greeks	0.000434347	7.78034e-05	5.58262
Kosovars	Tuscans,Bosnians	0.00043698	7.86242e-05	5.55783
[truncated: 1,992 more rows]
